# Eco-evolutionary community turnover following environmental change

*Jesse R. Lasky\**

*19 March 2018*

## **Abstract**

Co-occurring species often differ in intraspecific genetic diversity, which in turn can affect adaptation in response to environmental change. Specifically, the simultaneous evolutionary responses of co-occurring species to temporal environmental change may influence community dynamics. Local adaptation along environmental gradients combined with gene flow can promote genetic diversity of traits under selection within populations. Here I build off existing quantitative genetic theory to study community dynamics of locally adapted species in response to temporal environmental change. I show that species with greater gene flow have lower equilibrium population size due to maladaptive immigrant genotypes (migration load). However, following abrupt environmental change that leaves all species initially maladapted, high gene flow species adapt faster due to greater standing genetic diversity. As a result, communities may undergo a transient reversal in relative abundance, sometimes only after substantial lag periods. If constant temporal environmental change is applied, the community exhibits a shift toward stable dominance by species with intermediate gene flow. High gene flow species can sometimes increase abundance under environmental change if environmental change suppresses superior competitor but lower gene flow species. The community dynamics observed here parallel the purely ecological successional dynamics following disturbances and are analogous to the transient benefit of hypermutator alleles under changing environments. My results demonstrate how interspecific variation in life history can have far-reaching impacts on eco-evolutionary community response to environmental change.

---

\*lasky@psu.edu, Department of Biology, Pennsylvania State University

## 29 **1 Introduction**

30 Genetic diversity in quantitative traits serves as the raw material for selection (Lush  
31 1937). Understanding how rapid changes in selection impact populations is a question  
32 with tremendous importance in biodiversity conservation, agriculture, and medicine  
33 (Gomulkiewicz and Holt 1995; Bell and Gonzalez 2009; Read et al. 2011; Alexander  
34 et al. 2014; Lasky et al. 2015; Bay et al. 2017). A substantial portion of genetic  
35 diversity in phenotypes within species is maintained due to population adaptation  
36 to local environments (Turesson 1922; Clausen et al. 1940; Leimu and Fischer 2008;  
37 Hereford 2009). Local adaptation is defined as a genotype-by-environment interaction  
38 favoring home genotypes (Kawecki and Ebert 2004). When populations are locally  
39 adapted, greater gene flow can increase within-population diversity due to immigration  
40 from populations adapted to other environments (Barton 2001; Lenormand 2002;  
41 Garant et al. 2007). Given that local adaptation is common (Leimu and Fischer 2008;  
42 Hereford 2009) and multiple co-occurring species can be simultaneously adapted to  
43 local environments, these processes could impact genetic diversity of co-occurring  
44 species and community responses to environmental change. Here I build on previous  
45 theory to study the complex role gene flow plays in communities due to its effect on  
46 genetic diversity, which induces migration load on populations but also speeds up  
47 adaptation (Pease et al. 1989; Kremer et al. 2012 ).

48 Spatial selective gradients are an important force that maintains genetic variation  
49 within species (Leimu and Fischer 2008; Hereford 2009; Sanford and Kelly 2010). Gene  
50 flow across selective gradients can be a major source of within-population diversity,  
51 with the level of gene flow influencing the level of diversity (Barton 2001). A substantial  
52 body of theory explores the conditions under which such selective gradients lead to  
53 stable polymorphism and local adaptation (Haldane 1930; Slatkin 1973; Felsenstein  
54 1977; Kirkpatrick and Barton 1997; Behrman and Kirkpatrick 2011; Yeaman and  
55 Whitlock 2011; Le Corre and Kremer 2012). In systems where populations are locally  
56 adapted, many immigrants to a given location may be poorly suited to the local  
57 environment, as these immigrants originate from populations adapted to different  
58 environments (Haldane 1956; Mayr 1963; Kirkpatrick and Barton 1997; Lenormand  
59 2002; Polechová and Barton 2015). These maladapted immigrants can impose a  
60 “migration load” on populations, reducing population size due to lower average fitness  
61 among individuals in a population (Barton 2001; Lenormand 2002; Farkas et al. 2013;  
62 Polechová and Barton 2015). Assuming organisms have a limited ability to disperse  
63 into appropriate environments (e.g. passive dispersers), migration load increases with  
64 increasing rate and spatial scale of gene flow (among other factors discussed below,  
65 Slatkin 1973; Kirkpatrick and Barton 1997; Polechová and Barton 2015).

66 The observation that humans are rapidly changing global environments has spurred  
67 interest in understanding temporal changes in selection (Bay et al. 2017; Siepielski et al.  
68 2017). Environmental change can cause population decline, extinction, or persistence

69 via plasticity or evolution (Aitken et al. 2008). Theoretical and experimental studies  
70 have largely focused on two scenarios of environmental change: 1) a rapid, abrupt shift  
71 from a historical selection regime to a new one (Gomulkiewicz and Holt 1995; Orr and  
72 Unckless 2008) or 2) sustained change in selection through time (Pease et al. 1989;  
73 Lynch and Lande 1993; Gonzalez et al. 2013). Most theoretical studies have focused  
74 on the binary outcome of whether species survive or go extinct following environmental  
75 change. For example, a number of authors have investigated factors influencing the  
76 probability of evolutionary rescue (Gomulkiewicz and Holt 1995; Orr and Unckless  
77 2008; Bell and Gonzalez 2009), which is defined as adaptation that prevents extinction  
78 following environmental change (Gonzalez et al. 2013). Pease et al. (1989) and Lynch  
79 and Lande (1993) studied the maximal rates of environmental change that allow  
80 species to persist (avoid extinction). An emerging area of inquiry has investigated  
81 community evolutionary rescue, roughly defined as evolutionary rescue of multiple  
82 co-occurring species (Fussmann and Gonzalez 2013; Kovach-Orr and Fussmann 2013;  
83 Low-Décarie et al. 2015). Still, little is known about how evolutionary response to  
84 rapid environmental change impacts abundance patterns. Despite this gap, community  
85 and ecosystem processes are strongly influenced by abundance dynamics of component  
86 species, such that understanding abundance responses to environmental change is a  
87 key goal of community and ecosystem ecology (Loreau 2010; Clark et al. 2014*b*).

88 Among the factors that determine population response to environmental change  
89 are initial population size and genetic diversity in the trait under selection. When  
90 populations are initially small before environmental change, a species faces a greater  
91 risk of stochastic extinction following environmental change (Gomulkiewicz and Holt  
92 1995). Additionally, if genetic variants do not exist within a population that are  
93 beneficial after environmental change then a population will wait for new mutations  
94 or immigrant alleles (e.g. Orr and Unckless 2008), a scenario most relevant when  
95 adaptation is oligogenic. Alternatively, standing variation within populations may  
96 allow more rapid adaptation, if adaptive variants are already present at the time of  
97 environmental change (Bonhoeffer and Nowak 1997). Such standing variation can be  
98 caused by gene flow along spatial selective gradients (Kirkpatrick and Barton 1997). In  
99 particular, quantitative genetic models of local adaptation are relevant to adaptation  
100 to anthropogenic change because phenotypes involved in climate adaptation are often  
101 complex with polygenic architecture (Bay et al. 2017).

102 The effects of rapid environmental change on biodiversity are partly influenced by how  
103 multiple co-occurring species simultaneously respond to environment (Bradshaw 1984;  
104 Jackson and Overpeck 2000; Gilman et al. 2010; Urban et al. 2012). Typically studies  
105 of community and ecosystem responses to environmental change focus on ecological  
106 mechanisms, e.g. interspecific variation in demographic and physiological response  
107 to environment (Deutsch et al. 2008; Clark et al. 2014*a*; Lasky et al. 2014). For  
108 example, interspecific variation in dispersal ability is expected to have major effects on  
109 community response to environmental change, as some species are better able to track

110 spatial shifts in environmental niches (Ackerly 2003; Gilman et al. 2010; Urban et  
111 al. 2013). However, most approaches ignore another level of complexity: intraspecific  
112 variation and evolutionary response within members of a community. Authors have  
113 studied how multiple species simultaneously evolve following environmental change  
114 using simulation (De Mazancourt et al. 2008; Moran and Ormond 2015; Vanoverbeke  
115 et al. 2015). However, many multi-species models typically focus on species that begin  
116 having niche differentiation along climate gradients (e.g. De Mazancourt et al. 2008;  
117 Price and Kirkpatrick 2009; Norberg et al. 2012; Moran and Ormond 2015), but what  
118 happens for species occupying similar climatic niches remains to be explored (but see  
119 Fussmann and Gonzalez 2013; Osmond and Mazancourt 2013). To date there have  
120 been few analytical results for how evolutionary responses of multiple species impact  
121 community responses to environmental change.

122 Here I build on an existing quantitative genetic theory of local adaptation (Barton  
123 2001) and adaptation to a shifting optimum (Pease et al. 1989; Lynch and Lande  
124 1993). I reframe this theory to ask how locally-adapted populations respond following  
125 environmental change. I demonstrate the complex role interspecific variation in gene  
126 flow plays in communities due to its effect on genetic diversity, which induces migration  
127 load on populations but also causes faster adaptation (Pease et al. 1989; Kremer  
128 et al. 2012 ). I then ask how interspecific variation in gene flow and other traits  
129 impact community dynamics following environmental change due to ecological and  
130 evolutionary processes.

## 131 2 Model and Results

132 I start with a model of locally-adapted populations following Pease et al. (1989) and  
133 Barton (2001), a stochastic version of which was studied by Polechová and Barton  
134 (2015). The model I use is a deterministic model of a quantitative trait  $z$  subject to a  
135 spatially-varying selective gradient. The mean per capita reproductive rate is given by

$$\bar{r} = r_m \left(1 - \frac{N}{K}\right) - \frac{(\bar{z} - \theta)^2}{2V_S} - \frac{V_P}{2V_S} \quad (1)$$

136 where  $r_m$  is population growth rate of optimal phenotype individuals at low density,  
137  $N$  is census population size,  $K$  is carrying capacity, and  $V_P$  is variance of phenotype  $z$ .  
138 The first term on the right-hand side of equation 1 determines a reduction in fitness  
139 due to negative density dependence. The second term gives reduction in fitness due  
140 to the mismatch between the population mean phenotype  $\bar{z}$  and the local optimum  
141  $\theta$ , and  $V_S$  gives the inverse strength of stabilizing selection. Even if the population  
142 is adapted to the local optimum (i.e.  $\bar{z} = \theta$ ) there still may be many maladapted  
143 individuals (i.e.  $V_P > 0$ ), whose contribution to population mean fitness is determined  
144 by the third term on the right-hand side of equation 1.

145 The optimal trait value  $\theta$  changes in space ( $x$ ) at rate  $b$  such that  $\theta(x) = bx$  (Kirkpatrick  
146 and Barton 1997). The mean trait  $\bar{z}$  at a given location  $x$  changes through time  
147 due to curvature of the cline in space, asymmetric gene flow (modeled as a Gaussian  
148 with standard deviation  $\sigma$ ) across the cline due to spatial trends in abundance, and  
149 selection, given by the first three terms on the right hand side of the following equation,  
150 respectively

$$\frac{\partial \bar{z}}{\partial t} = \frac{\sigma^2}{2} \frac{\partial^2 \bar{z}}{\partial x^2} + \sigma^2 \frac{\partial \ln(N)}{\partial x} \frac{\partial \bar{z}}{\partial x} + V_G \frac{\partial r}{\partial z}. \quad (2)$$

151 The final term in equation 2 is the classic quantitative genetic result where change  
152 in the mean trait  $\bar{z}$  is a function of genetic variance ( $V_G$ ) multiplied by the selection  
153 function ( $\frac{\partial r}{\partial z}$ ). Population dynamics at  $x$  are given by

$$\frac{\partial N}{\partial t} = \frac{\sigma^2}{2} \frac{\partial^2 N}{\partial x^2} + \bar{r}N \quad (3)$$

154 where the first term on the right-hand side of equation 3 gives change to due spatial  
155 trends in abundance and unequal immigration versus emigration, and the second term  
156 gives change due to average fitness of individuals.

157 Assuming constant  $K$  through space, a stable equilibrium exists where all populations  
158 are locally adapted along the linear environmental gradient  $b$ , i.e.  $\bar{z} = \theta$  at all  $x$   
159 (Barton 2001). An additional consequence of local adaptation and a linear cline in  $\bar{z}$  is  
160 that  $\frac{\partial^2 \bar{z}}{\partial x^2} = 0$  and constant population size in space,  $\frac{\partial \ln(N)}{\partial x} = 0$ . Here I ignore spatial  
161 boundary conditions that would inevitably result in asymmetric gene flow.

162 Barton (2001) allowed genetic variance within a population in the trait  $z$  under  
163 selection ( $V_G$ ) to change as a function of gene flow. Thus the level of gene flow  
164 influences migration load and rate of adaptation. As gene flow increases, so does  
165 immigration of maladaptive genotypes into any given population such that  $V_G = b\sigma\sqrt{V_S}$   
166 and  $V_P = V_G + V_E$  where  $V_E$  is stochastic environmental variation in  $z$  (Barton 2001).

## 167 2.1 Impacts on community structure

168 Two traits that population biologists and community ecologists commonly study are of  
169 clear importance in this model: the rate and scale of dispersal/gene flow (determined  
170 by  $\sigma$ ) and reproductive rate at low density ( $r_m$ ). Maladapted immigrants depress mean  
171 fitness resulting in migration load (equation 1). Migration load can thus introduce  
172 uneven community structure when species differ in  $\sigma$  or  $r_m$ . The equilibrium census  
173 population size (Polechová and Barton 2015) as a proportion of carrying capacity  $K$ ,  
174  $\hat{N}$ , is given by

$$\hat{N} = 1 - \frac{b\sigma\sqrt{V_S} + V_E}{2V_S r_m} \quad (4)$$

175 . To identify the maximum  $\sigma$  capable of persistence I set  $\hat{N}$  to zero and solve the  
176 inequality to obtain

$$\sigma < \frac{2V_S r_m - V_E}{b\sqrt{V_S}} \quad (5)$$

177 Here I am interested in complex effects of species traits that might yield unexpected  
178 results under environmental change. While greater  $r_m$  decreases migration load  
179 (equation 4) it does not impact the rate of adaptation  $\frac{\partial \bar{z}}{\partial t}$  (equation 2). However, gene  
180 flow,  $\sigma$ , plays a more complex role.

181 To study how interspecific variation in  $\sigma$  could structure communities along spatiotem-  
182 poral environmental gradients, I now consider a community of species that vary only  
183 in  $\sigma$  (but not other parameters e.g.  $K$ ,  $V_S$ ,  $V_E$ ). For mathematical convenience I do  
184 not consider species interactions in the majority of the results below (e.g. analytical  
185 results). In many communities studied by ecologists, many species have weak interac-  
186 tions with other species, e.g. bird species might have very weak interactions with most  
187 other species. However, I also present simulation results below showing that many  
188 of the key conclusions of my analyses are qualitatively unchanged when including  
189 interspecific competition.

190 In the Barton (2001) model, greater  $\sigma$  increases  $V_G$  and migration load. Varying  
191 migration load among species results in variation in equilibrium census population  
192 size. From equation 4, the proportional reduction in  $\hat{N}$  due to migration load is equal  
193 to  $\frac{b\sigma}{2\sqrt{V_S r_m}}$ . I differentiate with respect to  $\sigma$  to obtain

$$\frac{d\hat{N}}{d\sigma} = -\frac{b}{2\sqrt{V_S r_m}} \quad (6)$$

194 which gives the slope of species equilibrium abundance versus gene flow. Thus the  
195 shape of the species abundance distribution across species of varying  $\sigma$  is obtained  
196 from equation 6. The parameters on the right of equation 6 are each constrained  
197 to be positive so that when holding these constant across species of varying  $\sigma$  there  
198 is clearly a negative relationship between  $\sigma$  and  $\hat{N}$ . The effect of migration load is  
199 stronger and abundance distribution is steeper as the selective gradient  $b$  is steeper,  
200 as stabilizing selection around the phenotypic optimum is stronger (smaller  $V_S$ ), or  
201 as the fitness at low population density ( $r_m$ ) decreases.

202 Note that in the equation (4) for  $\hat{N}$ ,  $\sigma$  and  $b$  appear together in a product and nowhere  
203 else, thus species that differ in  $b$ , the slope of selective gradients, will have similar  
204 differences in  $\hat{N}$  as species differing in  $\sigma$ . The product  $b\sigma$  gives effective gene flow  
205 across selective gradients, or the change in optimal phenotype  $z$  over one dispersal  
206 standard deviation (Kirkpatrick and Barton 1997). Here I focus on variation in  $\sigma$   
207 among species, given that interspecific variation in dispersal ability of propagules and  
208 gametes is a major interest in community ecology. However, it would be possible to  
209 reparameterize analyses below in terms of a composite,  $B$ , relevant for the process of  
210 gene flow across selective gradients  $B = b\sigma$  (cf. Kirkpatrick and Barton 1997).

## 211 2.2 Abrupt environmental change and transient community 212 turnover

213 The interesting effects of gene flow in a community context arise from the dual  
214 role of  $\sigma$  following environmental change. Greater  $\sigma$  can have a fitness benefit when  
215 population mean traits differ from the optimum,  $\bar{z} \neq \theta$ , such as in populations that have  
216 experienced recent environmental change (Kremer et al. 2012) or populations colonizing  
217 new environments. Greater  $\sigma$  proportionally increases  $V_G$ , which proportionally  
218 increases the speed of adaptation  $\frac{\partial \bar{z}}{\partial t}$  for a given selection regime  $\frac{\partial r}{\partial z}$  (third term on  
219 right-hand side of equation 2, first two terms remain zero).

220 I studied the effect of  $\sigma$  on the speed of adaptation using numerical simulations. I  
221 simulated non-overlapping generations whose dynamics were governed by discretized  
222 versions the above equations. Simulations were initialized with a locally-adapted  
223 population at equilibrium population size,  $N = \hat{N}$  and  $\bar{z} = \theta$ . I chose biologically  
224 plausible parameter values (although below I study other values):  $b = 0.05$ ,  $V_S = 1$ ,  
225  $V_E = 0.05$ ,  $r_m = 0.5$ , and  $\theta = 0$  (Polechová and Barton 2015). I then imposed an  
226 instantaneous change in  $\theta$  such that a new phenotype,  $\theta_1 = 1$ , was favored, and the  
227 change in selection was the same at all locations, i.e. in my scenarios of environmental  
228 change the slope  $b$  of the spatial selective gradient did not change (Figure 1). This  
229 scenario is mathematically convenient because all populations experience the same  
230 relative change and subsequent evolution and thus no spatial trend in abundance  
231 emerges ( $\frac{\partial \ln(N)}{\partial x} = 0$ ) nor does the cline in  $\bar{z}$  change ( $\frac{\partial^2 \bar{z}}{\partial x^2} = 0$ ). As a result,  $V_G$  is  
232 unchanged.

233 I first compare evolution of  $z$  for two species differing only in  $\sigma$  ( $\sigma_1 = 0.326$  and  
234  $\sigma_2 = 3.069$ ). Both species were subject to the same selective gradient  $b = 0.05$  and the  
235 clines in the phenotype  $z$  of the two species were equal in mean before environmental  
236 change, but with greater dispersion around the mean within any local population  
237 (i.e. greater  $V_G$ , Figure 1). I found the rapid adaptation to the new  $\theta$  in the high gene  
238 flow species with the lagging low  $\sigma$  species far behind (Figure 1).

239 It is clear that faster adaptation following a shift in environment (Figure 1) will lead  
240 to more rapid recovery of population mean fitness because the difference between  
241  $\bar{z}$  and  $\theta$  decreases more rapidly (eqn. 1). Although species with high  $\sigma$  are less  
242 abundant in communities in a stable environment (eqn. 4), the faster adaptation  
243 of these species may allow them to increase their relative abundance following an  
244 environmental change. But if the environment stabilizes following the change, the  
245 effects of the change may be transient. I here analyze results from simulations of these  
246 transient community dynamics.

247 To demonstrate the possibility of transient community turnover I tracked the change  
248 in  $N$  over time following the instantaneous environmental shift for the two species  
249 shown in Figure 1A-B. These species differ only in  $\sigma$  ( $\sigma = 0.326$  and  $\sigma = 3.069$ ,  
250 respectively) and exhibit a transient reversal in relative abundance as the high  $\sigma$

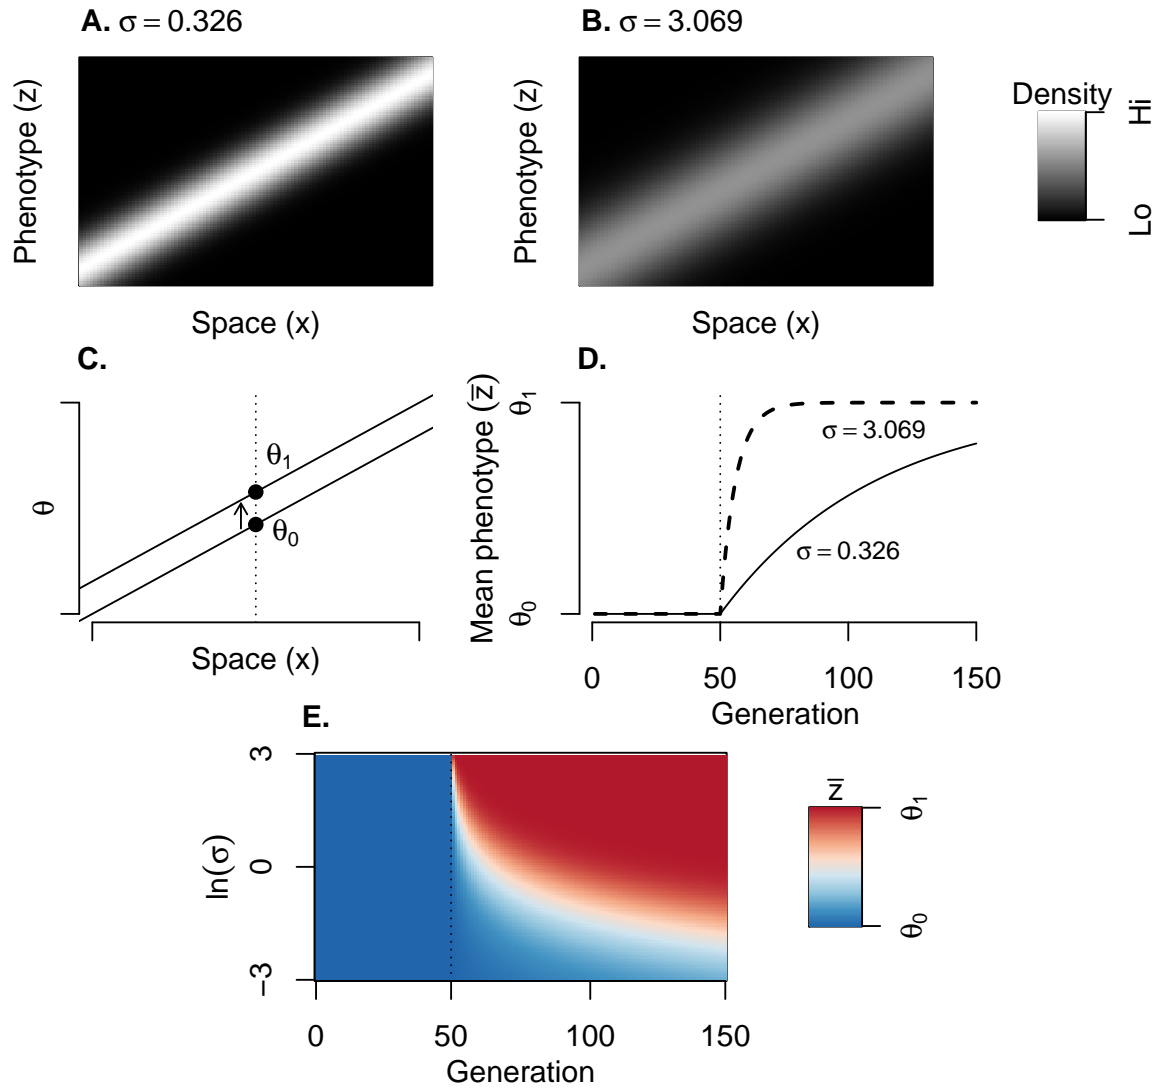

Figure 1: In a locally adapted system, variation in  $\sigma$ , the scale of gene flow, among species determines differences in genetic diversity and rate of adaptation. Species with low (A) and high (B)  $\sigma$  (gene flow) are subject to the same selective gradient  $b$  (favoring an increase in phenotype value through space from left to right) and all populations are locally adapted. However, the high  $\sigma$  species (B) has higher diversity of the trait under selection within populations ( $V_G$ ) at a given location in space (evident via thicker gray region for any given location along the  $x$ -axis) due to maladaptive immigration. I simulated an instantaneous change in optimal phenotype (C) at generation 50. Higher  $\sigma$  species adapt to the new optimum faster, (D) comparing low and high  $\sigma$  species, (E) comparing trait evolution for species with a range of  $\sigma$  values. (E) Blue is the optimal trait prior to the change, and all species begin locally adapted despite differences in  $V_G$ . Red is the optimal trait following the change, and high  $\sigma$  quickly adapt while low  $\sigma$  species lag. Parameter values (unless otherwise noted) were  $b = 0.05$ ,  $V_S = 1$ ,  $V_E = 0.05$ ,  $r_m = 0.5$ , and  $\theta_1 - \theta_0 = 1$ .



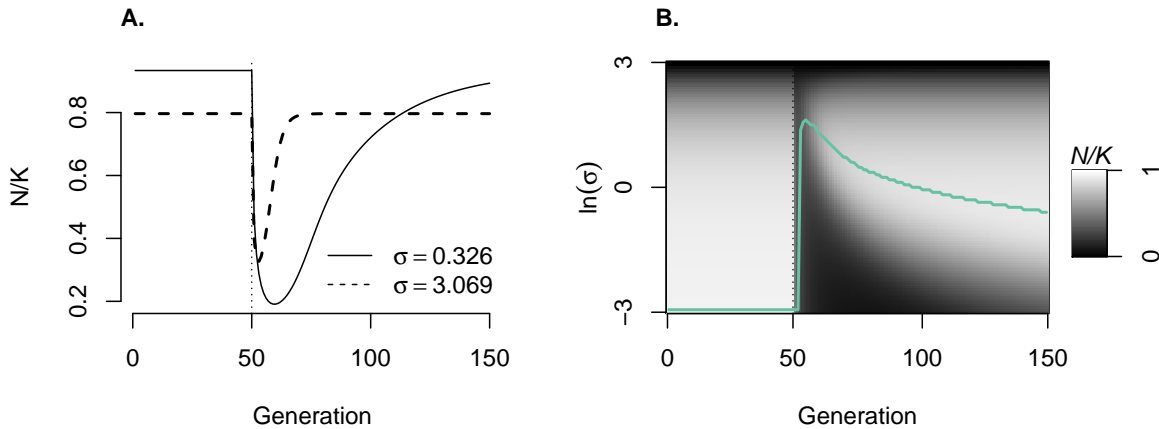

Figure 2: Changes in population size following an abrupt environmental change for species differing only in  $\sigma$ . (A) Time series of population size of two species (the same species as in Fig. 1A-B,1D), one with high  $\sigma$  and high  $V_G$  (dashed line) and one with low  $\sigma$  and low  $V_G$  (solid line). Populations are at equilibrium for the first 50 generations, after which an instantaneous environmental change occurs. Following this change, the species with high  $\sigma$  adapts faster and reaches equilibrium  $N$  before the species with low  $\sigma$ . (B) comparing  $N$  trajectories for species with a range of  $\sigma$  values. High  $\sigma$  quickly adapt while low  $\sigma$  species lag. The most abundant species at any generation is indicated by the green line. Parameter values (unless otherwise noted) were  $b = 0.05$ ,  $V_S = 1$ ,  $V_E = 0.05$ ,  $r_m = 0.5$ , and  $\theta_1 - \theta_0 = 1$ .

251 species is more abundant for an interval following the environmental change (Figure 2).  
 252 These simulations used the same aforementioned parameter values:  $b = 0.05$ ,  $V_S = 1$ ,  
 253  $V_E = 0.05$ ,  $r_m = 0.5$ ,  $\theta_0 = 0$ , and  $\theta_1 = 0$ .

254 Looking more broadly across species with a range of gene flow one can ask how  
 255 composition of a diverse community might shift due to different evolutionary responses  
 256 to environmental change driven by interspecific variation in  $\sigma$ . From the aforementioned  
 257 simulation of species with a range of  $\sigma$  values (Figure 1E), I calculated at any time  
 258 point which species was most abundant. It can be seen that under equilibrium, the  
 259 species with lowest  $\sigma$  has highest  $N$  (eqn. 4 and Figure 2). Following an instantaneous  
 260 shift in  $\theta$ , higher  $\sigma$  species dominate but gradually give way to lower  $\sigma$  species because  
 261 all species  $\hat{N}$  are unchanged. However, the lag before poor dispersers adapt can be  
 262 quite long given the very low rate of adaptation for the lowest gene flow species (Figure  
 263 2).

264 Given that higher  $\sigma$  species have higher  $V_P$  and hence migration load (Equation 1),  
 265 the transient advantage of higher  $\sigma$  species comes from the faster approach of  $\bar{z}$  to  
 266  $\theta$  (Equation 2). Thus the magnitude of environmental change might influence the  
 267 strength of community turnover, i.e. the change in relative abundances of species  
 268 differing in  $\sigma$ . Under a weak shift in  $\theta$ , the benefit to adapting faster for high

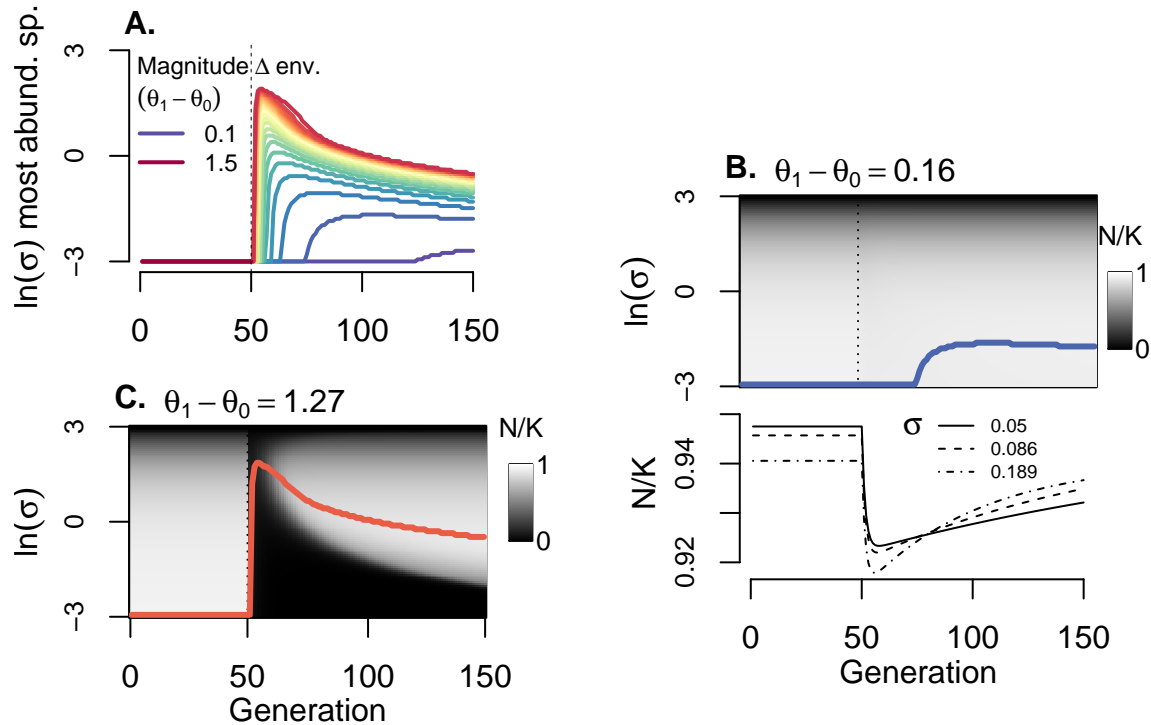

Figure 3: How the magnitude of environmental shift affects the magnitude of community turnover. (A) In general, the greater the environmental change, the higher the  $\sigma$  of the most abundant species soon after the environmental change (B). When the environmental change is too extreme, all species go extinct, as for a change in  $\theta$  of 1.5 in this example. (C) When environmental change is smaller, a lag between environmental change and change in species relative abundances can occur. Populations are at equilibrium and adapted to  $\theta_0$  for the first 50 generations, when an instantaneous environmental change to  $\theta_1$  occurs. Parameter values (unless otherwise noted) were  $b = 0.05$ ,  $V_S = 1$ ,  $V_E = 0.05$ , and  $r_m = 0.5$ .

269  $\sigma$  species is lower. Figure 3 illustrates these effects. When the magnitude of the  
 270 environmental shift is large, community turnover (as determined by which species  
 271 transiently dominate the community following the environmental shift) is also large.  
 272 Notably, subtle shifts in environment lead to more subtle, though delayed changes in  
 273 the most dominant species (blue lines in Figure 3). This lag emerges because when a  
 274 species starts with greater  $N$  at equilibrium the differences between species in  $\bar{r}$  after  
 275 environmental change can take time to erode the initial advantage (Figure 3). Though  
 276 there is a lag before changes in species relative abundances, the differences among  
 277 species in  $\bar{r}$  are evident shortly after environmental change in the form of differences  
 278 in  $\frac{\partial N}{\partial t}$  (i.e. differences among species in slope of  $N$  trajectories are quickly visible in  
 279 Figure 3B).

280 I investigated how community turnover depends on species' per capita population

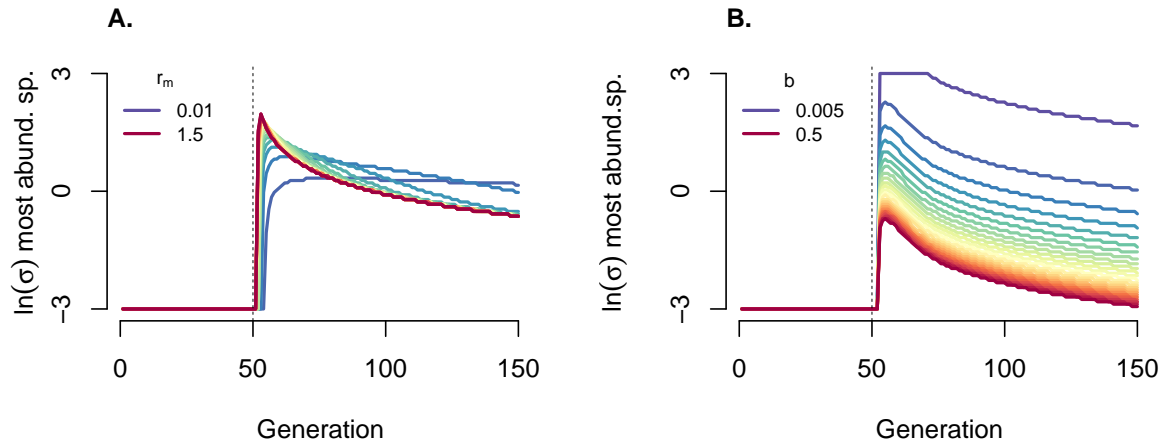

Figure 4: (A)  $r_m$  affects the magnitude of community turnover following an abrupt environmental change. Greater  $r_m$  results in an initially greater community turnover. High  $r_m$  reduces migration load and allows high  $\sigma$  species to leverage their faster adaptation following environmental change. Lower  $r_m$  increases migration load, limits the ability of high  $\sigma$  to take advantage of their faster adaptation, but also slows the rebound of eventually dominant species with low  $\sigma$ . (B) The slope of the spatial selective gradient ( $b$ ) affects the magnitude of community turnover following an abrupt environmental change. Greater  $b$  results in dominance by intermediate  $\sigma$  species following abrupt environmental change (imposed after 50 generations). Lower  $b$  allows higher  $\sigma$  species to briefly dominate, although in these scenarios migration load is low and relative abundance at equilibrium ( $\hat{N}$ ) under stable environments (generations 1-50) is only weakly related to  $\sigma$ . Parameter values (unless otherwise noted) were  $b = 0.05$ ,  $V_S = 1$ ,  $V_E = 0.05$ ,  $r_m = 0.5$ , and  $\theta_1 - \theta_0 = 1$ .

281 growth rates at low density ( $r_m$ ). Greater  $r_m$  reduces the effects of maladaptive  
 282 immigration on  $\hat{N}$  (equation 4). Greater  $r_m$  also allows for persistence (i.e.  $\hat{N} > 0$ )  
 283 of species with higher  $\sigma$  (inequality 5). Low  $r_m$  reduces the maximum possible  $\sigma$   
 284 because low  $r_m$  enhances migration load, thus there is less of a change in the species  $\sigma$   
 285 with maximal abundance following environmental change (Figure 4A). However, the  
 286 recovery of species from low density is strongly dependent on  $r_m$  and thus the return  
 287 to equilibrium is slow, and the community is dominated by relatively higher  $\sigma$  species  
 288 for a longer period of time. When  $r_m$  is high, more species with high  $\sigma$  can persist  
 289 and the rapid environmental change causes strong community turnover. Additionally,  
 290 higher  $r_m$  allows high  $\sigma$  species to increase in abundance as their traits approach the  
 291 new optimum (Figure 4A). However, the lower  $\sigma$  species are also able to increase in  
 292 population at a faster rate and the community reverts to equilibrium at a faster pace.

293 In nature, the slope of environmental gradients varies in space. These patterns can  
 294 influence gene flow across selective gradients by determining the spatial proximity of  
 295 distinct environments, and hence can effect migration load (Yeaman and Jarvis 2006).

296 An important observation is that in a system with low  $b$ , there will be predominantly  
297 gene flow between like environments. The slope of the species abundance curve ( $\frac{d\hat{N}}{d\sigma}$ )  
298 is proportional to  $b$  thus lower  $b$  will result in a more shallow curve. That is, migration  
299 load is reduced and species differing in  $\sigma$  have similar abundances.

300 I investigated the impacts of varying the slope of spatial gradients on turnover in  
301 communities following rapid environmental change. When I simulated systems of  
302 varying  $b$ , the most obvious impact is on the magnitude of community turnover  
303 following environmental change. Before the environmental change, low  $\sigma$  species  
304 dominate regardless of  $b$ . Immediately after the environmental change, high  $\sigma$  species  
305 dominate when  $b$  is low. Note that when  $b$  is low, differences in abundance of species  
306 differing in  $\sigma$  are subtle due to low migration load, though there is relatively high  
307 turnover in which species are most abundant following the environmental change.  
308 When  $b$  is high, the environmental change results in turnover favoring species of  
309 intermediate  $\sigma$ . Surprisingly, the change in relative species abundances following the  
310 environmental change happens at a similar rate regardless of  $b$  (lines in Figure 4B have  
311 similar trajectories following environmental change), although higher  $b$  results in faster  
312 return to equilibrium because the initial community turnover was less. Regardless  
313 of  $b$ , species proportional differences in  $V_G$  are unaffected, as they are proportional  
314 to  $\sigma$  and thus species differences in  $\partial z/\partial t$  are of the same proportional relationship  
315 (equation 2).

316 Barton (2001) and Polechová and Barton (2015) investigated how faster change in  
317 environments at range margins, i.e. increasing magnitude of  $b$ , impacts local adaptation.  
318 My results on how  $b$  influences community turnover due to differential evolutionary  
319 response to environmental change may apply to such changes in  $b$  in space. The  
320 present model applies assuming that the rate of change in  $b$  is subtle, such that  $\partial \bar{z}/\partial x$   
321 remains approximately linear. If  $b$  is sharper at range margins (for an assemblage of  
322 species, this would correspond to ecotones at the margin of ecoregions, for example  
323 along very steep altitudinal gradients), migration load would be stronger at margins  
324 and there migration load would have a stronger influence on community composition  
325 at equilibrium (i.e. steeper  $\frac{d\hat{N}}{d\sigma}$ ). However, following environmental change, the change  
326 in species rank abundance will be greater in the range core (low  $b$ ) while there would  
327 be lesser change in species rank at range margins (high  $b$ ).

328 Interspecific trait variation is often correlated across multiple trait axes, corresponding  
329 to ecological strategies and life histories. Thus it is unlikely that interspecific variation  
330 in  $\sigma$  would be independent of other traits. To explore potential impacts of trait  
331 covariation, I studied the situation where  $\sigma$  and  $r_m$  positively covary such that higher  
332 gene flow species also exhibit higher per capita population growth when rare. For  
333 example, plants with small seeds often have higher fecundity (Aarssen and Jordan  
334 2001) and greater dispersal distances (Turnbull et al. 1999). To test how such a  
335 correlation would influence community turnover following environmental change, I  
336 simulated a scenario where  $r_m = a + c \ln(\sigma)$  where  $a$  is an intercept and  $c$  determines

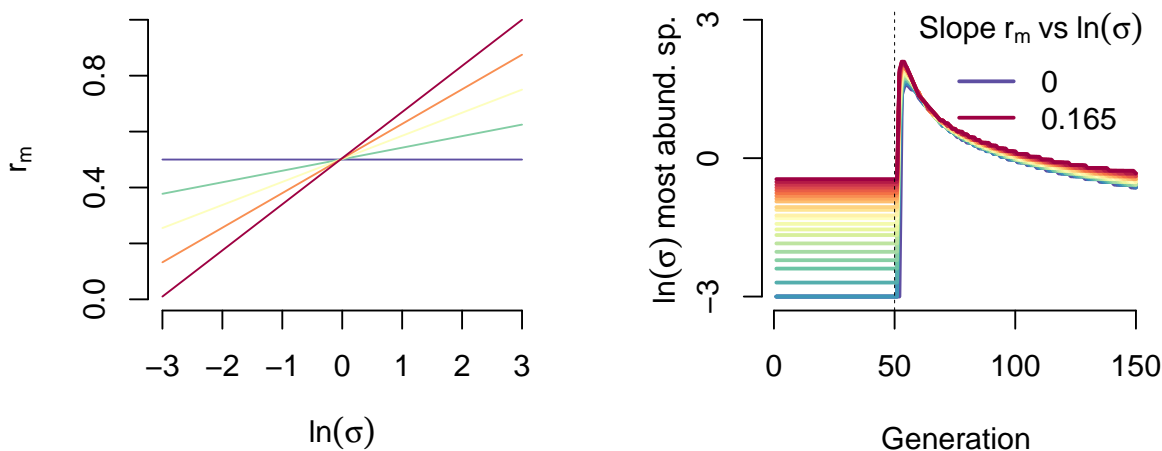

Figure 5: Correlation between reproductive rate at low density ( $r_m$ ) and gene flow ( $\sigma$ ) affects the magnitude of community turnover following an abrupt environmental change. Greater correlation results in dominance by intermediate (as opposed to low)  $\sigma$  species at equilibrium under constant environments. After 50 generations the instantaneous environmental change occurs and higher  $\sigma$  species briefly dominate. Parameter values (unless otherwise noted) were  $b = 0.05$ ,  $V_S = 1$ ,  $V_E = 0.05$ , and  $\theta_1 - \theta_0 = 1$ .

337 the rate at which  $r_m$  increases for species of higher  $\sigma$ . This correlation results in  
 338 opposing effects on  $\hat{N}$ : as  $r_m$  increases,  $\hat{N}$  increases (equation 4) but as  $\sigma$  increases,  
 339  $\hat{N}$  decreases. Thus there is a different relationship between  $\sigma$  and species abundance  
 340 at equilibrium: intermediate  $\sigma$  species have greatest abundance (Figure 5). Notably,  
 341 this correlation between  $r_m$  and  $\sigma$  has relatively less impact on community turnover  
 342 during the transient after an environmental change, though a stronger correlation  
 343 between  $r_m$  and  $\sigma$  results in much faster return to community equilibrium because  
 344 intermediate  $\sigma$  species were already dominant before environmental change.

### 345 2.3 Community turnover under sustained environmental 346 change

347 Temporal environmental change can take any functional form. Above I simulated  
 348 an instantaneous shift in environment that then stabilized (Gomulkiewicz and Holt  
 349 1995; Orr and Unckless 2008). Alternatively, environments may undergo more gradual  
 350 sustained directional shifts (Pease et al. 1989; Lynch and Lande 1993). Evolution of a  
 351 quantitative trait under stabilizing selection in response to sustained environmental  
 352 change has been analyzed previously by Pease et al. (1989) and Lynch and Lande  
 353 (1993). Selection, population growth, and adaptation in the Lynch and Lande (1993)  
 354 model were formulated the same as in the model here, with genetic variance enhancing  
 355 the rate of adaptation to a shifting optimum (though in their model gene flow was

not included). In the Lynch and Lande (1993) model, the optimum  $\theta$  changes at a rate  $k$  per unit time  $t$ . After a enough time has passed to allow for a balance between adaptation versus the shifting optimum, the mean trait ( $\bar{z}$ ) lags behind the optimum ( $\theta_0 + kt$ ) a stable distance which Lynch and Lande (1993) calculated as equal to  $-k\frac{V_S}{V_G}$ . In the present model, greater  $\sigma$  increases  $V_G$  and thus lower lag in  $\bar{z}$  behind the shifting optimum. Substituting the Barton (2001) equation for  $V_G$  in a locally adapted system into the previous expression results in a lag in  $\bar{z}$  equal to

$$(\theta_0 + kt) - \bar{z} = -\frac{k\sqrt{V_S}}{b\sigma} \quad (7)$$

i.e. lag in  $\bar{z}$  for a given species was proportional to  $\sigma^{-1}$ . Thus stronger stabilizing selection reduces the lag, though to a lesser degree than identified by Lynch and Lande (1993;  $\sqrt{V_S}$  versus  $V_S$ , Kremer et al. 2012). This is because when stabilizing selection is stronger (low  $V_S$ ) the fitness advantage of adapted genotypes is higher but stronger stabilizing selection also reduces  $V_G$  from immigration, slowing adaptation. I show here that on balance the effect of stabilizing selection is to reduce the lag (equation 7). Additionally, the lag increases as the selective gradient  $b$  becomes shallower because this also reduces  $V_G$ .

Lynch and Lande (1993) also derived the critical rate of environmental change above which populations go extinct (assuming large  $N_e$ ) as  $k_c = V_G\sqrt{2\frac{r_m - \frac{V_P}{2V_S}}{V_S}}$ . Substituting the Barton (2001) equation for  $V_G$  in a locally adapted system into the previous equation results in

$$k_c = b\sigma\sqrt{2r_m - \frac{b\sigma}{\sqrt{V_S}} - \frac{V_E}{V_S}} \quad (8)$$

This equation shows how  $k_c$  is non-monotonically related to  $\sigma$ , i.e.  $k_c$  is greatest for intermediate values of  $\sigma$ . Low  $\sigma$  species have low  $V_G$ , and hence slower  $\frac{\partial\bar{z}}{\partial t}$  but high  $\sigma$  species suffer from high migration load (high  $V_P$ ). The difference in this sustained environmental change scenario (compared to the abrupt change scenario above) is that slower  $\frac{\partial\bar{z}}{\partial t}$  continues to be a drag on  $\bar{r}$ , whereas after the abrupt change that then stops, slower  $\frac{\partial\bar{z}}{\partial t}$  becomes unimportant as  $\bar{z}$  approaches  $\theta$ .

To determine how the shifting optimum impacts community structure as  $t$  becomes large, I substituted the lag in  $\bar{z}$  to the previous equation for  $\hat{N}$  (equation 4). Thus at equilibrium trait lag under an environment shifting so that the optimal trait changes at rate  $k$ ,

$$\hat{N} = 1 - \frac{b\sigma\sqrt{V_S} + V_E}{2V_S r_m} - \frac{k^2}{2b^2\sigma^2 r_m} \quad (9)$$

where the first subtracted term gives migration load, which worsens with  $\sigma$ , while the second subtracted term gives the adaptation lag, which is ameliorated by  $\sigma$ . These opposing effects result in species with intermediate values of  $\sigma$  being most abundant

388 (Figure 7). Differentiating with respect to  $\sigma$  gives

389

$$\frac{d\hat{N}}{d\sigma} = \frac{k^2}{b^2\sigma^3r_m} - \frac{b}{2\sqrt{V_S}r_m} \quad (10)$$

390 . The maximum  $\hat{N}$  is attained by species with  $\sigma$  that cause the right hand side of  
391 equation 10 to equal zero, i.e. the  $\sigma$  with maximum  $\hat{N}$  is equal to  $(2k^2\sqrt{V_S})^{1/3}/b$ . This  
392 expression shows that the dominant species identity depends on only a few parameters.  
393 Note this expression equals zero when  $k$  is zero, thus consistent with results on locally  
394 adapted systems in constant environments where zero  $\sigma$  is favored due to lack of  
395 migration load (equation 6). Thus greater rates of environmental change through time  
396 ( $k$ ) favor higher  $\sigma$  species, but at a decreasing rate ( $k^{\frac{2}{3}}$ , equation 10). Additionally,  
397 stronger stabilizing selection favors relatively lower  $\sigma$  species, due to the reduced  
398 migration load.

399 In this scenario of sustained environmental change, steepening selective gradients  
400 (higher  $b$ ) results in a lower  $\sigma$  having maximum  $\hat{N}$ . Thus the results here parallel  
401 those for transient community turnover following an abrupt change in environment:  
402 at range margins or ecotones where  $b$  may be steeper, the magnitude of change in the  
403 most abundant species will be less, compared to where  $b$  is shallower.

## 404 2.4 Effects of species interactions

405 I simulated both scenarios of environmental change with non-zero species interactions,  
406 specifically interspecific competition. Simulations are presented in greater detail in  
407 the appendix. Adding weak Lotka-Volterra interactions ( $\alpha_{ij} = 0.01$ ) in a diverse  
408 community results in little effect on the trend in which species are most abundant  
409 following environmental change (Figures 9, 10, 12). However, adding stronger com-  
410 petition in lower diversity communities can result in extended suppression of low  $\sigma$   
411 species following environmental change. Following abrupt change, this suppression  
412 can last hundreds of generations. Under both scenarios of change, higher  $\sigma$  species  
413 that dominate communities can actually see increased absolute abundance following  
414 environmental change, despite going from being locally-adapted to being maladapted  
415 (e.g. Figure 12C). This surprising change results from the release from competitive  
416 suppression by low  $\sigma$  species.

## 417 2.5 Impacts on community-mean traits

418 Interspecific variation in adaptation following environmental change will likely have  
419 impacts on the distribution of traits in a community, which is often of interest to  
420 community and ecosystem ecologists (Muscarella and Uriarte 2016; Šímová et al. 2018).  
421 For example, ecosystem function may be influenced by the mass-averaged functional

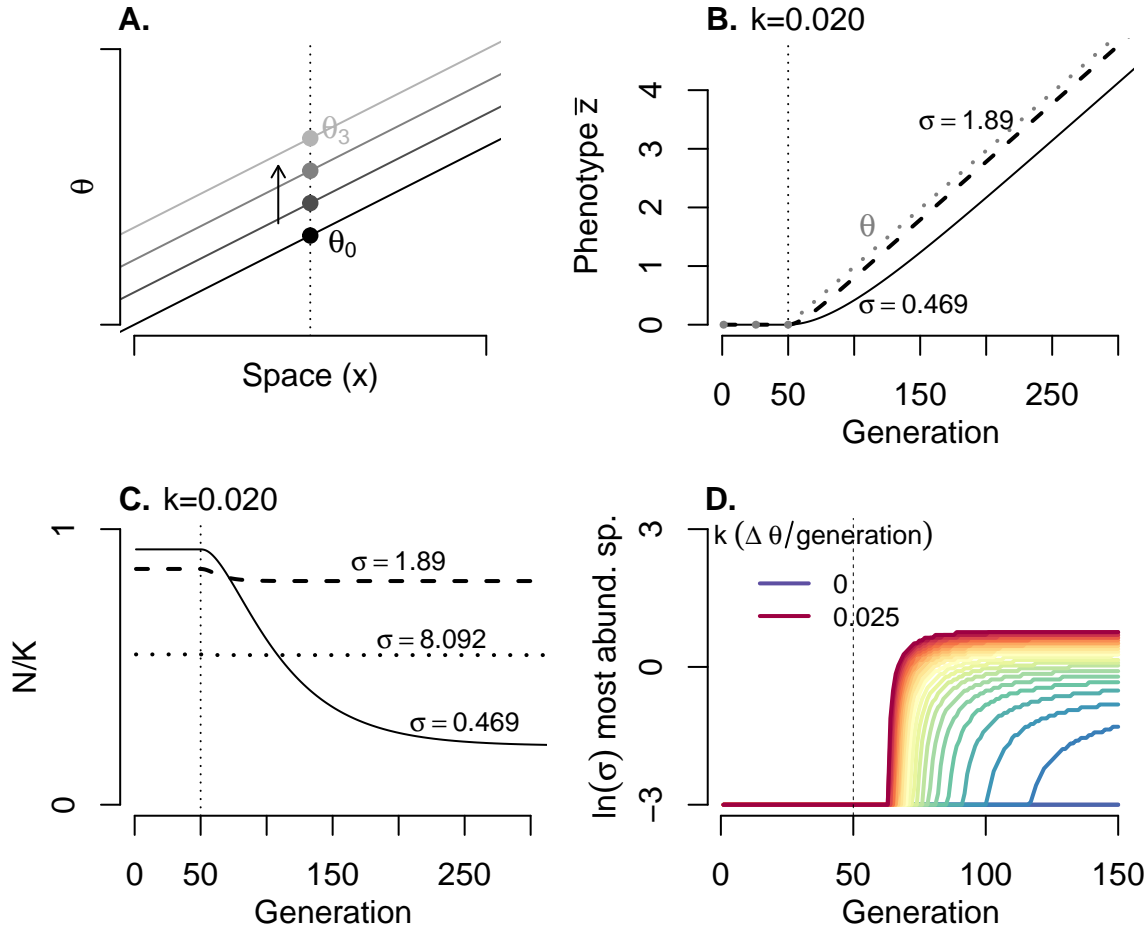

Figure 6: Effects of a sustained environmental change (i.e. a change in  $\theta$  through time). (A) Illustration of the scenario of shifting  $\theta$  across all locations, from a historical  $\theta_0$  to which species were locally adapted, to new  $\theta$ . (B-D) Environment is constant (constant  $\theta$ ) until the vertical dashed line at which point  $\theta$  changes at a constant amount  $k$  each generation. (B-C) Illustration with  $k = 0.020$  for example species. (B) Evolution of  $\bar{z}$  for two example species differing in  $\sigma$  relative to the shifting optimum ( $\theta$ ). (C) Population size trajectories for the same two species in addition to one higher  $\sigma$  species. (D) Effects of differing rate of environmental change ( $k$ ) on community turnover (i.e. the most abundant species under environmental change). Parameter values (unless otherwise noted) were  $b = 0.05$ ,  $V_S = 1$ ,  $V_E = 0.05$ , and  $r_m = 0.5$



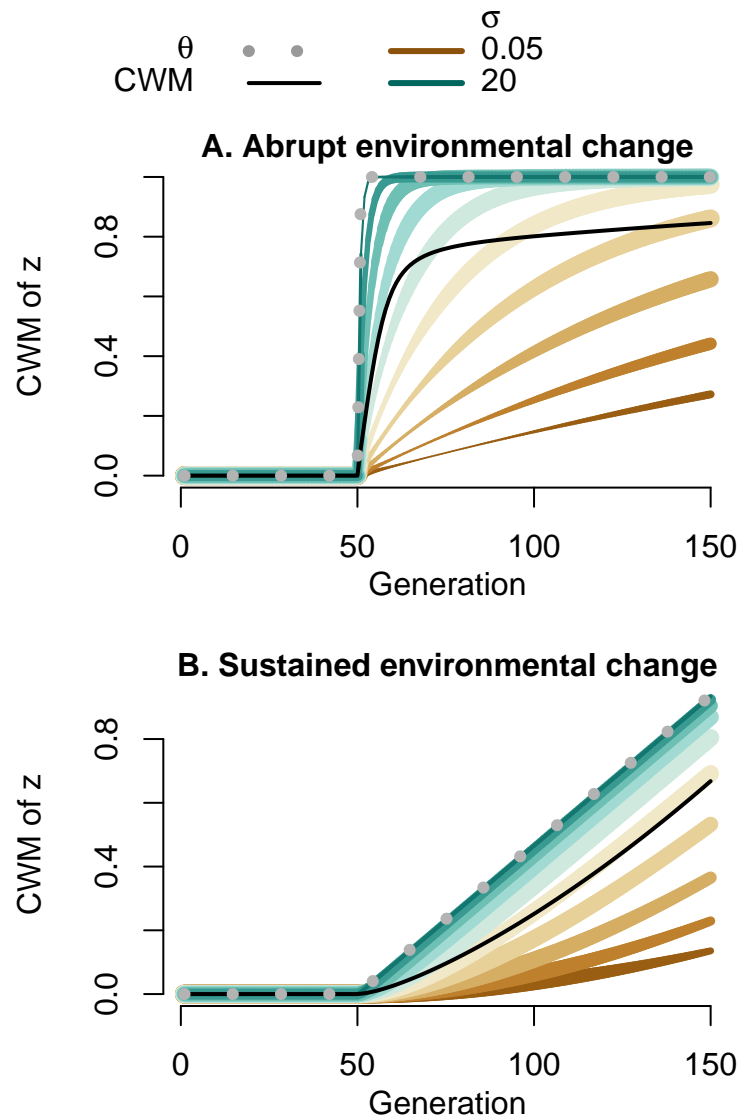

Figure 7: Effects of environmental change on community-weighted mean (CWM) traits under selection due to eco-evolutionary responses. Example species with a range of  $\sigma$  values are shown (colors), with line thickness indicating relative abundance. As in earlier presented simulations, communities were composed of species with a log uniform distribution of  $\sigma$  values. The CWM (black line) at each timepoint is an abundance-weighted average of  $z$ . Parameter values (unless otherwise noted) were  $b = 0.05$ ,  $V_S = 1$ ,  $V_E = 0.05$ , and  $r_m = 0.5$ . For (A),  $\theta_1 - \theta_0 = 1$ . For (B),  $k = 0.009$ .

422 traits in a community (Grime 1998). Under the scenario of abrupt environmental  
423 change, the slow adaptation and return to equilibrium abundance of species that  
424 dominate communities may have interesting effects on changes in community-weighted  
425 mean (CWM) traits. Indeed, following abrupt environmental change, initially there is  
426 a very rapid phase of change in CWM driven by fast-adapting high  $\sigma$  species (Figure  
427 8). However, there is an abrupt slow-down in change in CWM as most high  $\sigma$  species  
428 have adapted but low  $\sigma$  species remain maladapted. Nevertheless, the low migration  
429 load of these low  $\sigma$  species contributes to their fitness and abundance and hence  
430 influence over CWM traits (Figure 9). By contrast, when there is sustained change in  
431  $\theta$  over time, species exhibit marked variation in their ability to adapt to the moving  
432 optimum. Although the highest  $\sigma$  species are able to maintain  $\bar{z}$  close to the optimum,  
433 they are less abundant than intermediate  $\sigma$  species due to migration load (equation 10,  
434 Figure 8). Thus the CWM exhibits a substantial and stable lag behind the optimum.

## 435 2.6 Relationship of eco-evolutionary community turnover to 436 ecological succession

437 The transient dominance of species with higher gene flow following an abrupt environ-  
438 mental change is qualitatively similar to classic hypotheses explaining successional  
439 turnover in communities. Specifically, early successional species may have better  
440 dispersed propagules but lower fitness compared to later successional species. In the  
441 present model, gene flow and propagule dispersal are one in the same ( $\sigma$ ), i.e. there is  
442 no mechanism of gene flow apart from propagule movement (no gamete movement).  
443 To more formally investigate the similarity with succession, I studied how species  
444 differing in  $\sigma$  in the Barton (2001) model respond to ecological disturbance, with  
445 no change in  $\theta$ . In the absence of any environmental change, consider an ecological  
446 disturbance that reduces locally-adapted populations of different species by the same  
447 large proportion. For simplicity, I assumed a localized disturbance that introduced  
448 non-zero  $\frac{\partial^2 N}{\partial x^2}$  (equation 3) but did so orthogonally to  $b$  such that asymmetric migration  
449 had no effect on trait evolution (i.e.  $\frac{\partial \ln(N)}{\partial x}$  set equal to zero in equation 2).

450 Successional community turnover arises as species differ in the rate of population growth  
451 (eqn 3) due to interspecific variation in immigration (favoring high  $\sigma$  species) and fitness  
452 (favoring low  $\sigma$  species). However, note that the fitness advantage of low  $\sigma$  species is  
453 dependent on reproduction individuals already present, which are few after disturbance.  
454 My simulations showed that the more intense the disturbance, the slower the return  
455 to community equilibrium (Figure 9), analogous to the slower return following greater  
456 abrupt changes in  $\theta$  (Figure 3). Under a sustained ecological disturbance (constant  
457 proportion of individuals lost each generation) ecological community turnover exhibits  
458 qualitatively similar patterns to the eco-evolutionary response to sustained change  
459 in  $\theta$  (Figure 9). Specifically, sustained disturbance resulted in consistent dominance  
460 by species with intermediate  $\sigma$ , similar to these species being most abundant under

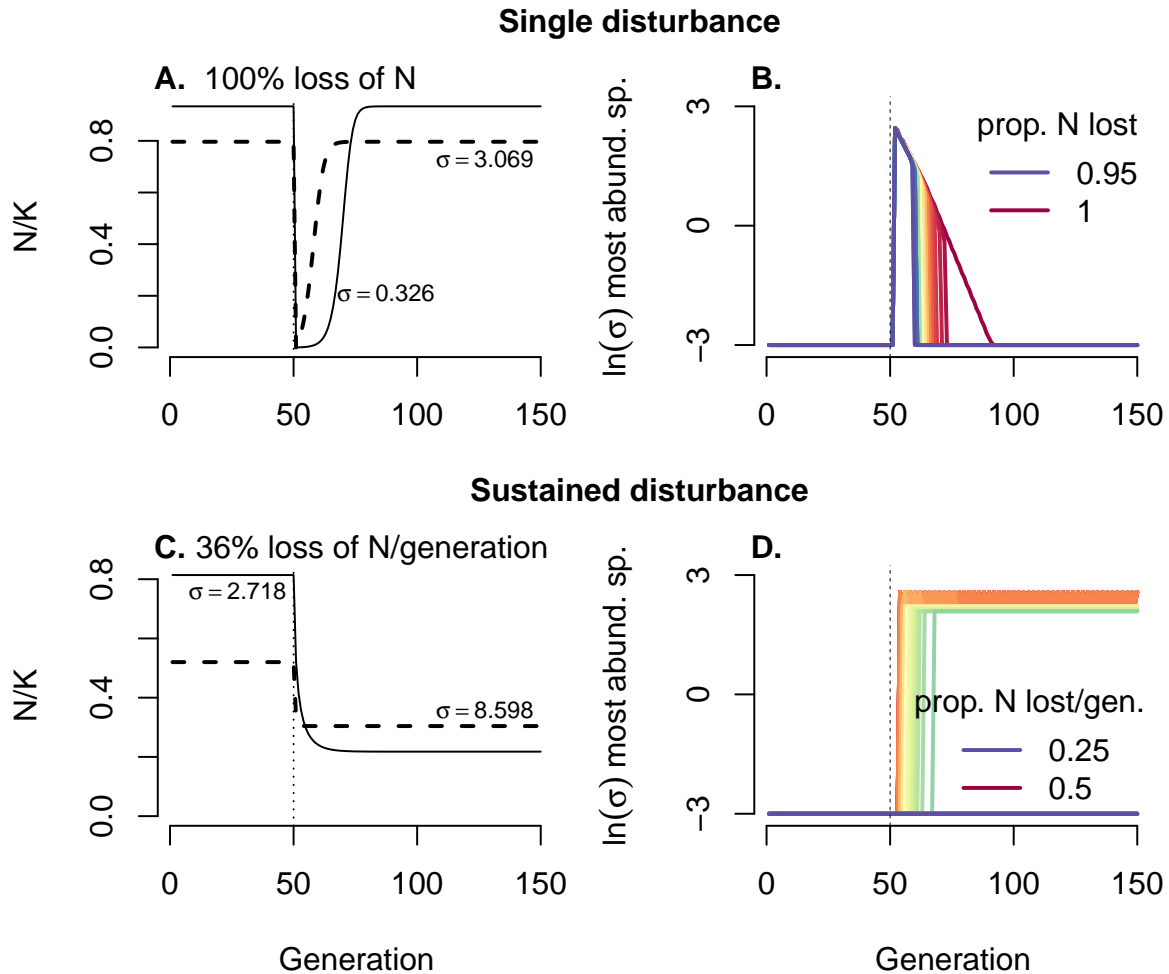

Figure 8: Variation in dispersal ( $\sigma$ ) among species determines how communities of locally-adapted populations respond to ecological disturbance. (A-B) A single disturbance removes a large portion of each species'  $N$  after generation 50. (C-D) recurring disturbances are imposed in each generation, starting after generation 50. Parameter values (unless otherwise noted) were  $b = 0.05$ ,  $V_S = 1$ ,  $V_E = 0.05$ ,  $r_m = 0.5$ , and  $\frac{\partial^2 N}{\partial x^2} = 5$ .

461 sustained change in optimal phenotypes (Figure 7).

### 462 **3 Discussion**

463 Evolutionary genetic theory is a rich source of hypotheses for how life history impacts  
464 evolution. On this rapidly changing planet, predictions about evolutionary responses  
465 to rapid environmental change are of particular importance (Bay et al. 2017; Gienapp  
466 et al. 2017). New molecular data are providing a glimpse of the substantial differences  
467 among species in population genomic patterns (Romiguier et al. 2014). The present  
468 is ripe for studying how interspecific trait differences impact evolutionary response to  
469 environmental change and the resulting consequences for community structure and  
470 ecosystem function. Here, I took existing quantitative genetic models of adaptation  
471 (Lynch and Lande 1993; Barton 2001) and showed how interspecific trait variation  
472 gives rise to differences in genetic diversity with non-monotonic effects on community  
473 structure and dynamics.

474 In general, eco-evolutionary community inversions (i.e. reversals in relative abundances)  
475 may arise in any system where there is a negative or complex relationship between  
476 census population size and adaptability to environmental change. These changes are  
477 driven by the fact that initially numerically abundant species are more maladapted  
478 for longer periods of time following environmental change. Genetic variance is has a  
479 major influence on the rate of adaptation, but other traits, such as generation time,  
480 vary among species in communities and may result in eco-evolutionary community  
481 turnover. For example, parasite generation time may be faster than hosts allowing  
482 faster adaptation to abiotic environmental change. Both vertebrate hosts (Fraser  
483 2013) and their parasites (Sternberg and Thomas 2014) may be locally-adapted  
484 along temperature gradients, though parasites might adapt to climate change faster  
485 and increase fitness faster than hosts. Alternatively, when census population size  
486 is positively related to genetic variance in a trait under selection (Frankham 1996),  
487 evolutionary responses to environmental change may reinforce the ecological responses,  
488 reducing community diversity.

489 I identified a transient benefit to high gene flow following an abrupt environmental  
490 change, due to faster adaptation. In their experimental microcosm study, Low-Décarie  
491 et al. (2015) demonstrated how gene flow was key to the eco-evolutionary recovery of  
492 soil microbial communities responding to a novel herbicide. Studies of genetic variation  
493 (Lande and Shannon 1996) from dispersal (Blanquart and Gandon 2011) or mutation  
494 (Taddei et al. 1997) have yielded similar results. When environment is constant, low  
495 mutation rates are favored, though mutator lineages have transient benefits when they  
496 find adaptive mutations (Taddei et al. 1997). Additionally, fluctuating environments  
497 can favor higher mutation rates (Travis and Travis 2002) similar to the finding here  
498 that sustained environmental change stably favors higher rates of gene flow despite

499 resulting maladaptation. Indeed, co-occurring species can exhibit a range of mutation  
500 rates (Baer et al. 2007), which may also play a role in species differences in the degree of  
501 local adaptation and subsequent responses to environmental change (Orr and Unckless  
502 2008). Here, I did not allow explicit evolution of dispersal distance ( $\sigma$ ), though the  
503 comparison of population sizes for my “species” of differing  $\sigma$  provide insight into  
504 how dispersal would evolve in this system. In a temporally constant environment  
505 (prior to generation 50 in simulations), dispersal is maladaptive due to the spatial  
506 selective gradient (Balkau and Feldman 1973). However, once temporal change in  
507 environment is introduced, greater dispersal can be favored with the functional form of  
508 temporal environmental change determining the optimal  $\sigma$  (see Blanquart and Gandon  
509 2011 for more detailed analysis). Here, I did not investigate interspecific variation in  
510 phenotypic plasticity, which may supplant local adaptation as a way to respond to  
511 environmental gradients. As with migration load, if census population size is related  
512 to the degree of local adaptation versus plasticity (i.e. habitat specialization versus  
513 generalization) then complex community change following environmental change may  
514 result. Under some models, greater dispersal across environmental gradients can favor  
515 plastic responses to environment (Sultan and Spencer 2002; reviewed by Hendry 2016).

516 The form of environmental change may have dramatic effects on how eco-evolutionary  
517 responses influence communities. Previous theory has shown how the benefits of genetic  
518 variation (Lande and Shannon 1996) and dispersal (Blanquart and Gandon 2011) can  
519 depend on the functional form of environmental change. I found that communities can  
520 exhibit distinct dynamics depending on a scenario of abrupt environmental change  
521 (Gomulkiewicz and Holt 1995; Orr and Unckless 2008) versus sustained change (Pease  
522 et al. 1989; Lynch and Lande 1993). Specifically, sustained change favors intermediate  
523 gene flow species and results in their stable dominance (highest  $N$ ) in communities,  
524 whereas abrupt environmental change results in only transient community change  
525 favoring high to intermediate  $\sigma$  species. In nature any form is possible and thus  
526 the main purpose of my results is to demonstrate the importance of the form of  
527 environmental change. It is unclear whether current anthropogenic climate change  
528 will stabilize, as stabilization would require dramatic action (Pachauri et al. 2014).

529 It is important to note that I modeled community turnover in an arbitrary local  
530 population, but these effects are expected to happen across the species ranges. This  
531 suggests that there is a large potential spatial extent of eco-evolutionary responses  
532 to rapid environmental change, resulting in community inversion across large regions.  
533 In nature  $b$  is non-linear and rugged, a scenario worthy of study in future simulation  
534 of response to temporal environmental change. Furthermore, multiple traits may be  
535 under simultaneous spatially-varying selection (Guillaume 2011; MacPherson et al.  
536 2015) and selective regimes on these traits may change simultaneously. Given that  
537 environmental change can be complex, with different forms of change in different  
538 environmental dimensions, it is possible that in nature changes in selective gradients  
539 may take multiple functional forms simultaneously leading to complex changes in

540 relative abundance for species differing in  $\sigma$ .

541 The model studied here was simple and thus it is challenging to determine how  
542 important my results are in natural systems. However, gene flow across spatial  
543 selective gradients is likely a major source of within-population genetic variation in  
544 traits under selection (Yeaman and Jarvis 2006; Paul et al. 2011; Farkas et al. 2013).  
545 Findings on ponderosa pine (Yeaman and Jarvis 2006) suggest that spatial variability  
546 in  $b$  can lead to among-population variability in  $V_G$ . Less is known, however, of  
547 how adaptability or  $V_G$  are related to interspecific variation in census population size  
548 (abundance). The negative relationship between these two quantities is the key to  
549 community turnover following environmental change in my results, although this result  
550 depends on the form of environmental change. It is challenging to determine the  
551 importance of my results in nature, at least partly because there is often a substantial  
552 lag before better dispersing species dominate communities (Figures 3 & 7), thus  
553 researchers may overlook population changes caused by environmental change.

554 It may be a common feature of strongly interacting species that both experience  
555 selective gradients driven by the same environmental variable (e.g. temperature).  
556 Differences among these species in local adaptation to the same environmental variable  
557 might lead to different eco-evolutionary responses to environmental change, causing  
558 indirect effects on interacting species (Fussmann and Gonzalez 2013). For example,  
559 multiple competing tree species may simultaneously be locally-adapted along environ-  
560 mental gradients (Ikeda et al. 2014). Recent work by Brans et al. (2017) has shown  
561 similar intraspecific trait clines in multiple co-occurring cladocerans along urbanization  
562 gradients drives community patterns. Here I included simulations of competing species,  
563 but interactions of different types (e.g. trophic) may yield unexpected eco-evolutionary  
564 community responses to changing environments.

565 My work demonstrates how interspecific variation in gene flow alters communities  
566 experiencing environmental change. Some authors have suggested assisted gene flow  
567 as a technique to mitigate climate change impacts on wild populations, with gene  
568 flow facilitating local adaptation of populations suddenly experiencing novel climates  
569 (Aitken and Whitlock 2013). My results highlight how such approaches could have  
570 important effects on community structure. Aitken and Whitlock (2013) suggested  
571 that assisted gene flow efforts should be focused on ecologically dominant species (due  
572 to importance for ecosystem functioning) and rare species (to prevent extinction).  
573 My results show how such a strategy would likely change community structure, as  
574 species not included (historically intermediate abundance species) in assisted gene  
575 flow would be expected to decline in abundance due to slower adaptation to climate  
576 change. Others have suggested breeding of wild species to promote adaptation to  
577 future environments (Oppen et al. 2015). These management efforts would have to  
578 be balanced across species of different abundances if they are to limit impacts on  
579 community composition.

### 580 **3.1 Conclusion**

581 Community composition is defined by the population sizes of component species, but  
582 greater population size might not correspond to greater adaptability to environmental  
583 change. This discrepancy can result in complex community turnover as selection  
584 regimes shift. The simple model studied here demonstrates some of the potential  
585 complexity in community change. Future research would improve our ability to predict  
586 responses to environmental change in nature by learning more about the population  
587 genetics and ecology underlying adaptation in addition to theoretical investigation of  
588 more complex scenarios.

### 589 **3.2 Acknowledgments**

590 This manuscript benefited from comments by Hidetoshi Inamine, Martin Turcotte,  
591 Andrew Gonzalez, and Andrew Hendry, in addition to conversations with Andrew  
592 Read, Katriona Shea, and Timothy Reluga.

## 593 4 Appendix

### 594 4.1 Effects of species interactions

595 Here I present simulation results for when species within a community compete with  
596 each other. I simulated simple Lotka-Volterra competition. Instead of equation 1, I  
597 used a discrete time version of the following

$$\bar{r} = r_m \left( 1 - \frac{N_i - \sum_{i \neq j}^J N_j \alpha_{ij}}{K} \right) - \frac{(\bar{z} - \theta)^2}{2V_S} - \frac{V_P}{2V_S} \quad (\text{A1})$$

598 where  $N_i$  is the population size of the focal species  $i$  and there are  $J$  total competitor  
599 species each with population sizes of  $N_j$ .  $\alpha_{ij}$  determines the strength of interspecific  
600 competition. Interactions were symmetric among species such that all  $\alpha_{ij} = \alpha_{ji}$ . My  
601 simulations in the main text involved communities of  $J = 100$  species differing in  $\sigma$ . I  
602 studied a simple scenario with such a community having weak pairwise interactions  
603 between all species,  $\alpha_{ij} = 0.01$ . Because all species experience approximately equal  
604 effects of interspecific competition, the relative differences among species in  $\hat{N}$  remain  
605 approximately the same, albeit with a decrease in the maximum  $\sigma$  capable of persisting  
606 (Figure 10).

607 I here replicate analyses from the main text, but using equation A1 to determine  $\bar{r}$ .  
608 Note that per equation 2, adaptation is not influenced by such competitive interactions  
609 (i.e. such competition does not influence  $\frac{\partial r}{\partial z}$ ;  $\alpha_{ij}$  is unrelated to  $z_i$ ) (Fussmann and  
610 Gonzalez 2013; cf. Osmond and Mazancourt 2013). In simulations, I initiated species  
611 at their equilibrium abundance ( $\hat{N}$ ) in the absence of interspecific competition, but  
612 then allowed 150 generations with interspecific competition before imposing change in  
613  $\theta$ .

### 614 4.2 Response to abrupt environmental change

615 Adding symmetrical and weak species interactions has no qualitative effect on my  
616 results. For example, a similar pattern of transient community turnover following  
617 environmental change is observed (Figure 10). Reductions in population size were  
618 nearly equivalent for all species in a diverse community with weak competition (Figure  
619 10). Thus the main effect of adding weak species interactions in a diverse community  
620 was to reduce the maximal  $\sigma$  capable of persisting.

621 Similarly, variation in the magnitude of abrupt environmental change has similar  
622 impact on community dynamics, as measured as  $\sigma$  of the most dominant species,  
623 regardless of whether the simulated competition was present (Figure 11).

624 However, I also simulated three competing species with  $\alpha_{ij} = 0.75$ . Here, competition  
625 had little effect on how the  $\sigma$  of the most abundant species changed with time



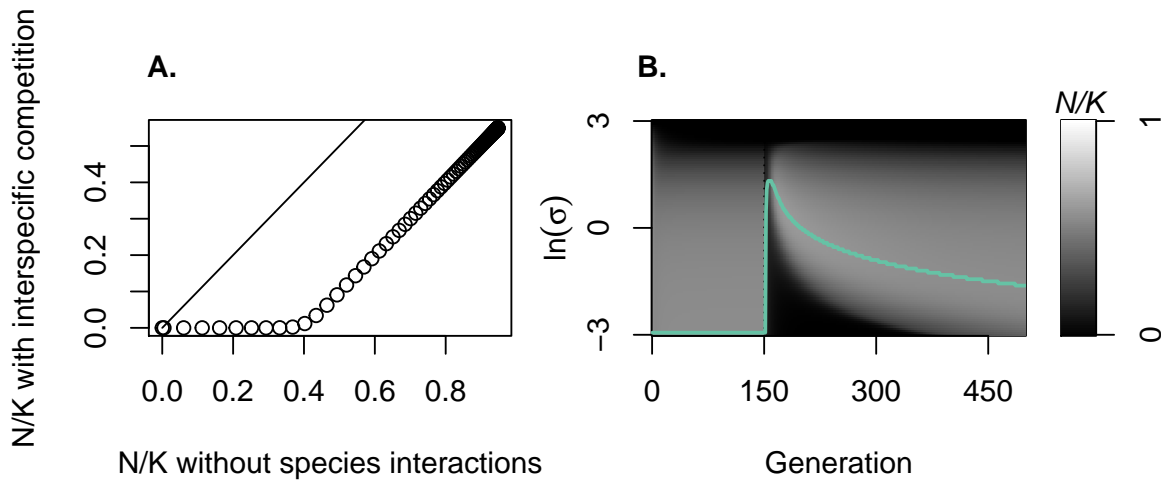

Figure 9: Community turnover under abrupt environmental change, with interspecific competition. (A) Comparing approximate equilibrium species'  $N$  for scenarios differing in presence of interspecific competition. Black circles show species in a diverse (100 species) community with weak interactions ( $\alpha_{ij} = 0.01$ ). Straight line shows one-to-one relationship. (B) Here the trend in abundance for a diverse (100 species) community is shown, where species weakly compete ( $\alpha_{ij} = 0.01$ ) according to Lotka-Volterra models. Parameter values (unless otherwise noted) were  $b = 0.05$ ,  $V_S = 1$ ,  $V_E = 0.05$ ,  $r_m = 0.5$ , and  $\theta_1 - \theta_0 = 1$ .

626 (Figure 12A-B). However, this similarity obscures underlying community patterns  
 627 caused by competition. In the presence of strong competition, species that have  
 628 relatively lower abundance following environmental change remained suppressed for  
 629 longer periods of time and at very low densities (compare Figure 12C and 12D).  
 630 Note that my deterministic simulations lack stochastic extinction, which is likely a  
 631 major problem for populations at very low density. In my simulations (Figure 12),  
 632 the low  $\sigma$  species that dominated under stable environments but reached low density  
 633 following environmental change are on a steady upward population trend at the end  
 634 of simulations (Figure 12C). Thus the dominance of higher  $\sigma$  species is still transient,  
 635 though with a much slower return to the pre-environmental change equilibrium  $\hat{N}$ .

### 636 4.3 Sustained environmental change

637 I also simulated how interspecific competition impacts the eco-evolutionary community  
 638 response to a sustained environmental change. I used the same model of species  
 639 interactions as described above (A1) under the scenario of shifting  $\theta$  at rate  $k$  through  
 640 time. I began testing a diverse community of weakly interacting species. I found that  
 641 which species dominated following the initiation of environmental change was largely  
 642 the same regardless of these weak competitive interactions (compare Figure 12B with

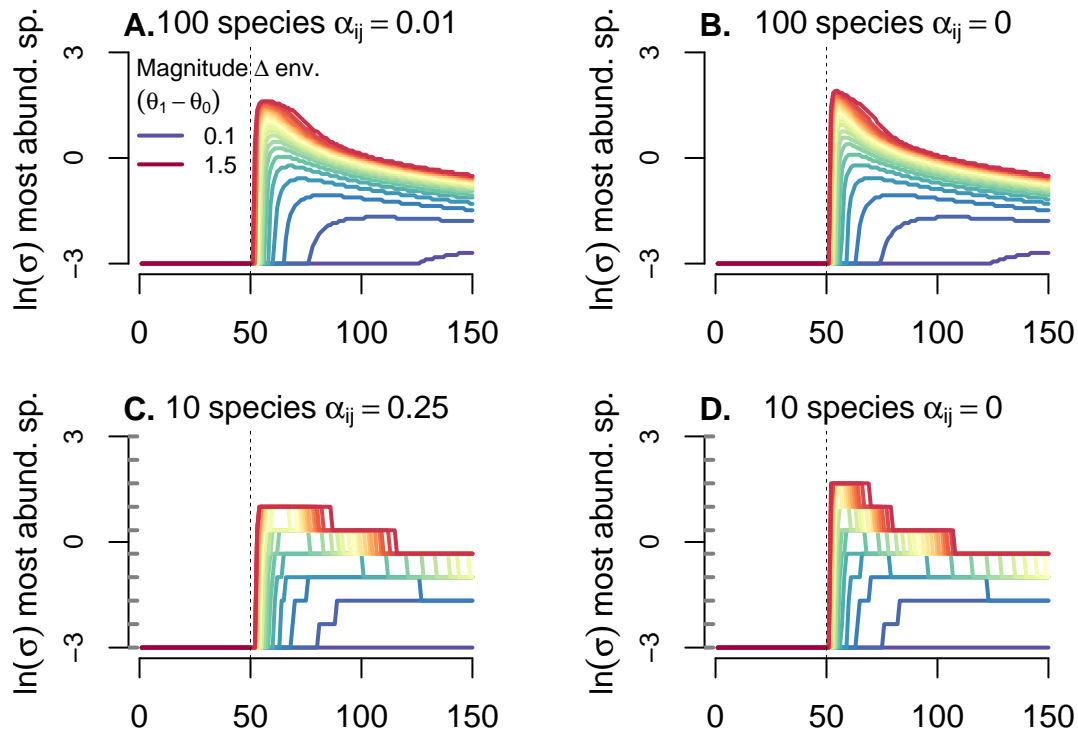

Figure 10: How the magnitude of environmental shift affects the magnitude of community turnover in the presence in interspecific competition. In general, the greater the environmental change, the higher the  $\sigma$  of the most abundant species soon after the environmental change, regardless of interspecific competition. (A-B) Weak competition has miniscule impact on community turnover. (C-D) When competition is stronger, similar turnover occurs though some higher  $\sigma$  species are unable to persist. Gray ticks in (C-D) correspond to the 10 species' simulated values of  $\sigma$ . Populations are at approximate equilibrium and adapted to  $\theta_0$  for the first 50 generations, when an instantaneous environmental change to  $\theta_1$  occurs. Parameter values (unless otherwise noted) were  $b = 0.05$ ,  $V_S = 1$ ,  $V_E = 0.05$ , and  $r_m = 0.5$ .

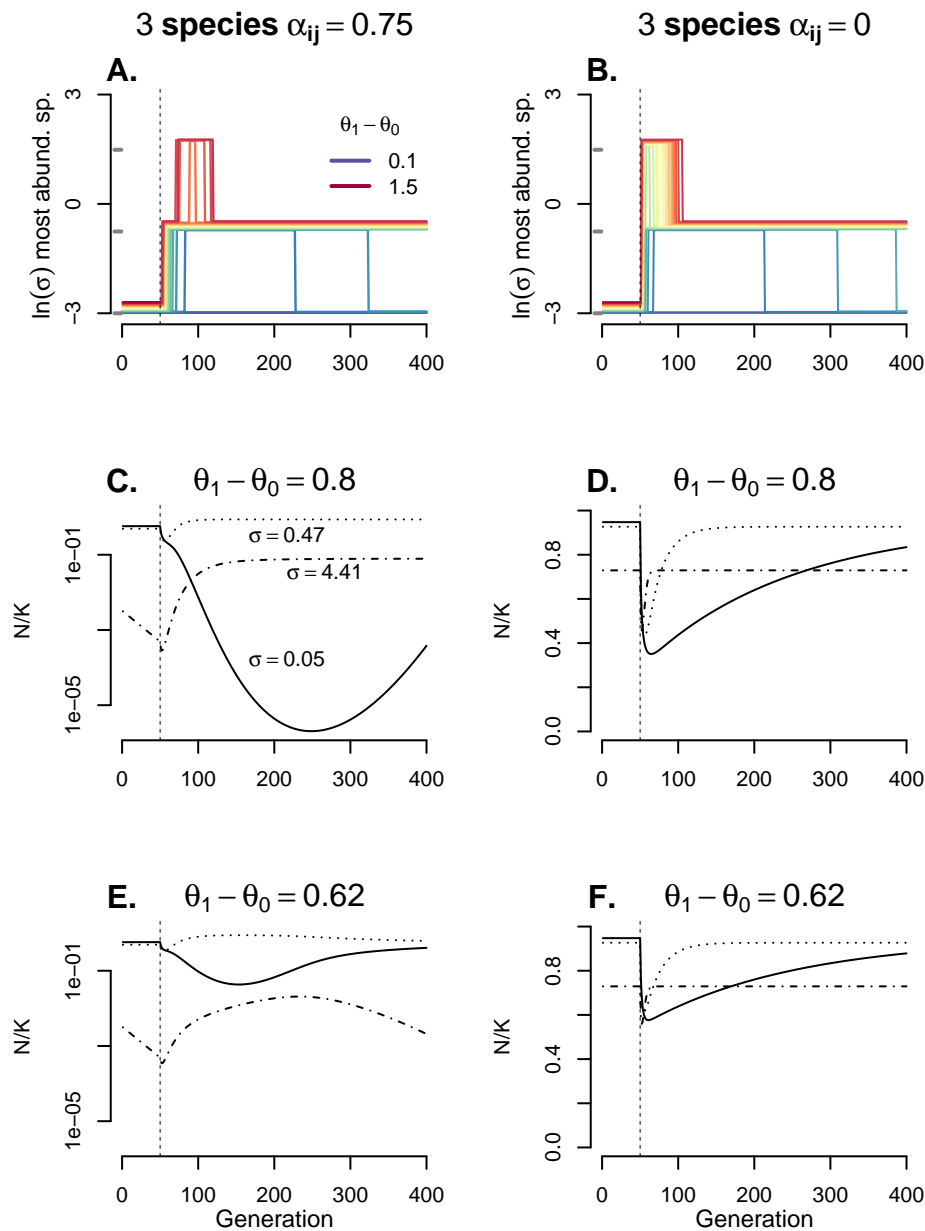

Figure 11: (A-B) How the magnitude of environmental shift affects the magnitude of community turnover in the presence (A, and left panels) or absence (B, and right panels) of interspecific competition in three species communities (species'  $\sigma$  values indicated by gray ticks at left). In general, the greater the environmental change, the higher the  $\sigma$  of the most abundant species soon after the environmental change, and the longer the duration of their dominance, regardless of interspecific competition. Despite the similarity in which species dominate following environmental change (A and B), interspecific competition has major effects on the abundance of lower abundance species (compare C versus D, E versus F). (C-F) show individual species time series (each line), corresponding to species with  $\sigma$  shown as gray ticks in A and B. Note that in order to show the non-zero abundance trajectories of less abundant species, y-axis is log scaled in C and E. Before environmental change at generation 50 to  $\theta_1$ ,  $\sigma$  is negatively related to  $N$ . Parameter values (unless otherwise noted) were  $b = 0.05$ ,  $V_S = 1$ ,  $V_E = 0.05$ , and  $r_m = 0.5$ .

643 Figure 6D). When increasing interaction strength in less diverse communities, I again  
644 found similar patterns in terms of which species were most abundant through time  
645 (Figure 12). However, the differences in abundance between species differed. When  
646 competition occurred, the most abundant species had greater abundance advantages.  
647 Interestingly, higher gene flow species actually had greater absolute abundance fol-  
648 lowing the initiation of environmental change with competition (Figure 12C). Thus  
649 the environmental change suppressed abundance of low gene flow species with low  
650 migration load and this allowed increases in abundance of higher gene flow species  
651 that were better able to adapt to shifting environments (compare Figure 12C vs 12E).

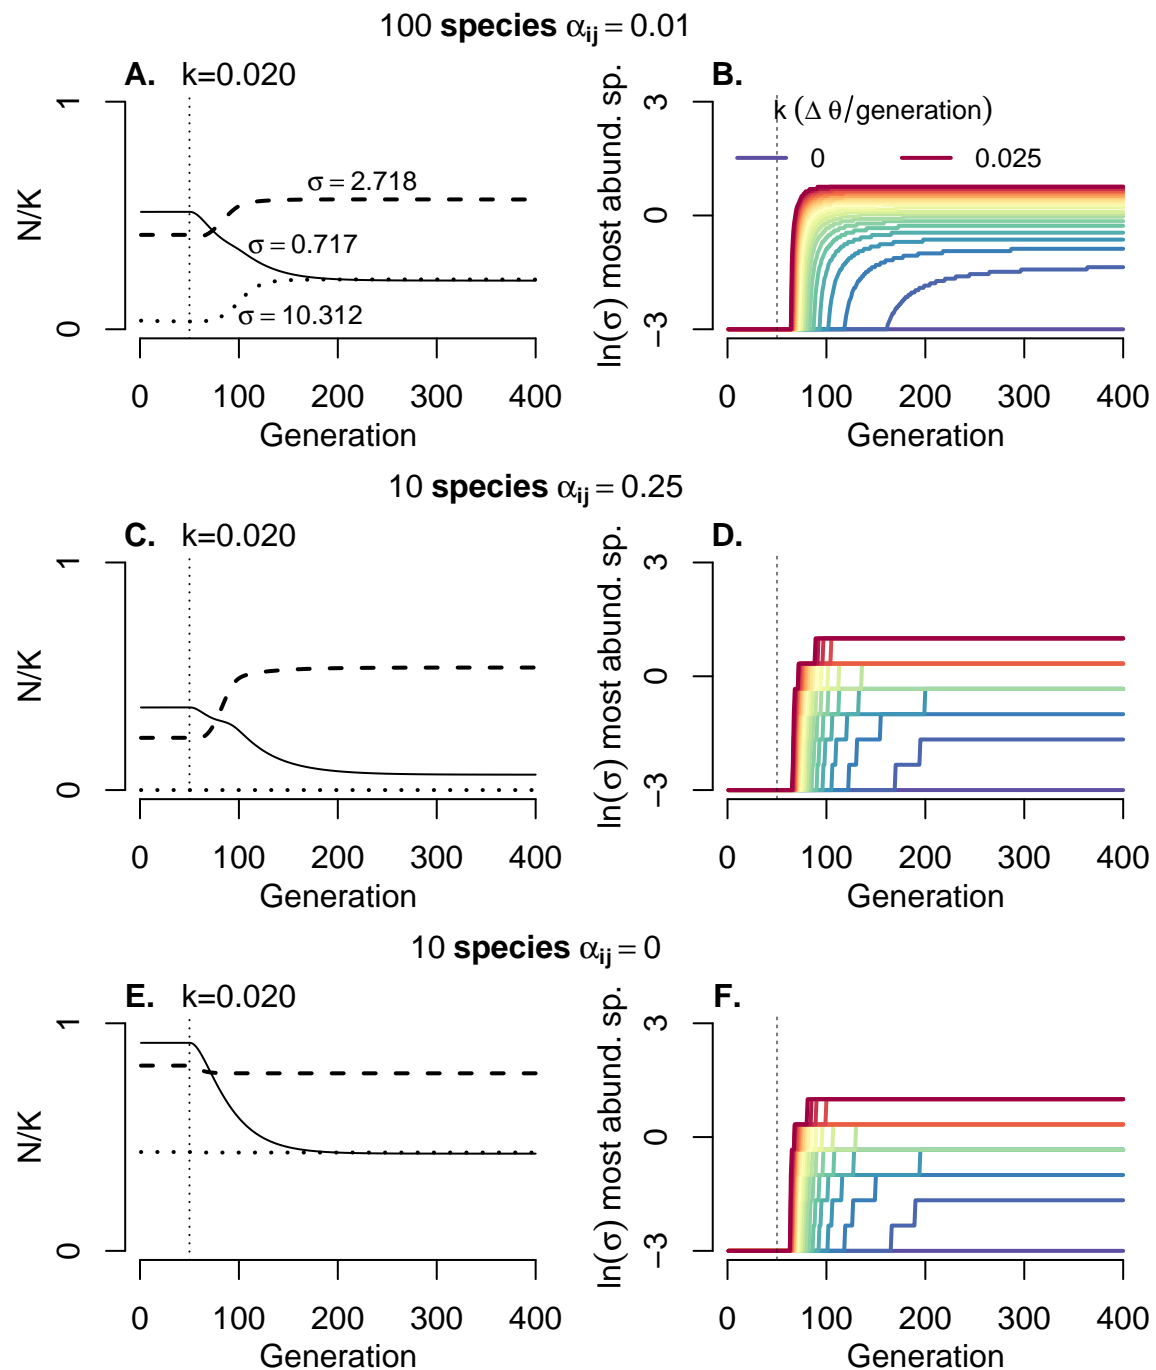

Figure 12: Effects of a sustained environmental change with interspecific competition, with the same three species (A, C, D) highlighted in each scenario, demonstrating how absolute abundance of higher  $\sigma$  species can increase following environmental change. (A-B) Diverse community with weak interactions. (C-D) Community with fewer species and stronger competition. (E-F) A community composed of the same species as (C-D) but with no interspecific competition. Vertical dashed line indicates beginning of environmental change at generation 50. Parameter values (unless otherwise noted) were  $b = 0.05$ ,  $V_S = 1$ ,  $V_E = 0.05$ , and  $r_{m_{29}} = 0.5$

## 652 **References**

- 653 Aarssen, L. W., and C. Jordan. 2001. Between-species patterns of covariation in plant  
654 size, seed size and fecundity in monocarpic herbs. *Écoscience* 8:471–477.
- 655 Ackerly, D. D. 2003. Community assembly, niche conservatism, and adaptive evolution  
656 in changing environments. *International Journal of Plant Sciences* 164:S165–S184.
- 657 Aitken, S. N., and M. C. Whitlock. 2013. Assisted gene flow to facilitate local  
658 adaptation to climate change. *Annual Review of Ecology, Evolution, and Systematics*  
659 44:367–388.
- 660 Aitken, S. N., S. Yeaman, J. A. Holliday, T. Wang, and S. Curtis-McLane. 2008.  
661 Adaptation, migration or extirpation: Climate change outcomes for tree populations.  
662 *Evolutionary Applications* 1:95–111.
- 663 Alexander, H. K., G. Martin, O. Y. Martin, and S. Bonhoeffer. 2014. Evolutionary  
664 rescue: Linking theory for conservation and medicine. *Evolutionary Applications*  
665 7:1161–1179.
- 666 Baer, C. F., M. M. Miyamoto, and D. R. Denver. 2007. Mutation rate variation in  
667 multicellular eukaryotes: Causes and consequences. *Nature Reviews Genetics* 8:619.
- 668 Balkau, B. J., and M. W. Feldman. 1973. Selection for migration modification.  
669 *Genetics* 74:171–174.
- 670 Barton, N. H. 2001. Adaptation at the edge of a species' range. *SPECIAL*  
671 *PUBLICATION-BRITISH ECOLOGICAL SOCIETY* 14:365–392.
- 672 Bay, R. A., N. Rose, R. Barrett, L. Bernatchez, C. K. Ghalambor, J. R. Lasky, R. B.  
673 Brem, et al. 2017. Predicting responses to contemporary environmental change using  
674 evolutionary response architectures. *The American Naturalist* 189:463–473.
- 675 Behrman, K. D., and M. Kirkpatrick. 2011. Species range expansion by beneficial  
676 mutations. *Journal of Evolutionary Biology* 24:665–675.
- 677 Bell, G., and A. Gonzalez. 2009. Evolutionary rescue can prevent extinction following  
678 environmental change. *Ecology Letters* 12:942–948.
- 679 Blanquart, F., and S. Gandon. 2011. Evolution of migration in a periodically changing  
680 environment. *The American Naturalist* 177:188–201.
- 681 Bonhoeffer, S., and M. A. Nowak. 1997. Pre-existence and emergence of drug  
682 resistance in HIV-1 infection. *Proceedings of the Royal Society B: Biological Sciences*  
683 264:631–637.
- 684 Bradshaw, A. D. 1984. The importance of evolutionary ideas in ecology and vice versa.  
685 *Evolutionary ecology* 1–25.
- 686 Brans, K. I., L. Govaert, J. M. T. Engelen, A. T. Gianuca, C. Souffreau, and L. D.  
687 Meester. 2017. Eco-evolutionary dynamics in urbanized landscapes: Evolution, species

- 688 sorting and the change in zooplankton body size along urbanization gradients. *Phil.*  
689 *Trans. R. Soc. B* 372:20160030.
- 690 Clark, J. S., D. M. Bell, M. C. Kwit, and K. Zhu. 2014a. Competition-interaction  
691 landscapes for the joint response of forests to climate change. *Global Change Biology*  
692 20:1979–1991.
- 693 Clark, J. S., A. E. Gelfand, C. W. Woodall, and K. Zhu. 2014b. More than the sum of  
694 the parts: Forest climate response from joint species distribution models. *Ecological*  
695 *Applications* 24:990–999.
- 696 Clausen, J., D. D. Keck, and W. M. Hiesey. 1940. Experimental studies on the nature  
697 of species. i. effect of varied environments on western north american plants. *Carnegie*  
698 *institution of washington publication no. 520*. Washington, DC.
- 699 De Mazancourt, C., E. Johnson, and T. G. Barraclough. 2008. Biodiversity inhibits  
700 species' evolutionary responses to changing environments. *Ecology Letters* 11:380–388.
- 701 Deutsch, C. A., J. J. Tewksbury, R. B. Huey, K. S. Sheldon, C. K. Ghalambor, D. C.  
702 Haak, and P. R. Martin. 2008. Impacts of climate warming on terrestrial ectotherms  
703 across latitude. *Proceedings of the National Academy of Sciences* 105:6668–6672.
- 704 Farkas, T. E., T. Mononen, A. A. Comeault, I. Hanski, and P. Nosil. 2013. Evolution  
705 of camouflage drives rapid ecological change in an insect community. *Current Biology*  
706 23:1835–1843.
- 707 Felsenstein, J. 1977. *Multivariate normal genetic models with a finite number of loci*.  
708 United States.
- 709 Frankham, R. 1996. Relationship of genetic variation to population size in wildlife.  
710 *Conservation Biology* 10:1500–1508.
- 711 Fraser, H. B. 2013. Gene expression drives local adaptation in humans. *Genome*  
712 *Research* 23:1089–1096.
- 713 Fussmann, G. F., and A. Gonzalez. 2013. Evolutionary rescue can maintain an  
714 oscillating community undergoing environmental change. *Interface Focus* 3:20130036.
- 715 Garant, D., S. E. Forde, and A. P. Hendry. 2007. The multifarious effects of dispersal  
716 and gene flow on contemporary adaptation. *Functional Ecology* 21:434–443.
- 717 Gienapp, P., S. Fior, F. Guillaume, J. R. Lasky, V. L. Sork, and K. Csilléry. 2017.  
718 Genomic quantitative genetics to study evolution in the wild. *Trends in Ecology &*  
719 *Evolution*.
- 720 Gilman, S. E., M. C. Urban, J. Tewksbury, G. W. Gilchrist, and R. D. Holt. 2010. A  
721 framework for community interactions under climate change. *Trends in Ecology &*  
722 *Evolution* 25:325–331.
- 723 Gomulkiewicz, R., and R. D. Holt. 1995. When does evolution by natural selection

- 724 prevent extinction? *Evolution* 49:201–207.
- 725 Gonzalez, A., O. Ronce, R. Ferriere, and M. E. Hochberg. 2013. Evolutionary rescue:  
726 An emerging focus at the intersection between ecology and evolution. *Phil. Trans. R.*  
727 *Soc. B* 368:20120404.
- 728 Grime, J. P. 1998. Benefits of plant diversity to ecosystems: Immediate, filter and  
729 founder effects. *Journal of Ecology* 86:902–910.
- 730 Guillaume, F. 2011. Migration-induced phenotypic divergence: The migration-selection  
731 balance of correlated traits. *Evolution; International Journal of Organic Evolution*  
732 65:1723–1738.
- 733 Haldane, J. B. S. 1930. A mathematical theory of natural and artificial selection.(Part  
734 VI, isolation.). Pages 220–230 *in* *Mathematical proceedings of the cambridge philo-*  
735 *sophical society* (Vol. 26). Cambridge Univ Press.
- 736 Haldane, J. B. S. 1956. The relation between density regulation and natural selection.  
737 *Proceedings of the Royal Society of London. Series B, Biological Sciences* 145:306–308.
- 738 Hendry, A. P. 2016. Key questions on the role of phenotypic plasticity in eco-  
739 evolutionary dynamics. *Journal of Heredity* 107:25–41.
- 740 Hereford, J. 2009. A quantitative survey of local adaptation and fitness trade-offs.  
741 *The American Naturalist* 173:579–588.
- 742 Ikeda, D. H., H. M. Bothwell, M. K. Lau, G. A. O’Neill, K. C. Grady, and T. G.  
743 Whitham. 2014. A genetics-based universal community transfer function for predicting  
744 the impacts of climate change on future communities. *Functional Ecology* 28:65–74.
- 745 Jackson, S. T., and J. T. Overpeck. 2000. Responses of plant populations and  
746 communities to environmental changes of the late quaternary. *Paleobiology* 26:194–  
747 220.
- 748 Kawecki, T. J., and D. Ebert. 2004. Conceptual issues in local adaptation. *Ecology*  
749 *Letters* 7:1225–1241.
- 750 Kirkpatrick, M., and N. H. Barton. 1997. Evolution of a species’ range. *The American*  
751 *Naturalist* 150:1–23.
- 752 Kovach-Orr, C., and G. F. Fussmann. 2013. Evolutionary and plastic rescue in  
753 multitrophic model communities. *Philosophical Transactions of the Royal Society of*  
754 *London B: Biological Sciences* 368:20120084.
- 755 Kremer, A., O. Ronce, J. J. Robledo-Arnuncio, F. Guillaume, G. Bohrer, R. Nathan,  
756 J. R. Bridle, et al. 2012. Long-distance gene flow and adaptation of forest trees to  
757 rapid climate change. *Ecology Letters* 15:378–392.
- 758 Lande, R., and S. Shannon. 1996. The role of genetic variation in adaptation and  
759 population persistence in a changing environment. *Evolution* 50:434–437.
- 760 Lasky, J. R., H. D. Upadhyaya, P. Ramu, S. Deshpande, C. T. Hash, J. Bonnette,



- 761 T. E. Juenger, et al. 2015. Genome-environment associations in sorghum landraces  
762 predict adaptive traits. *Science Advances* 1:e1400218.
- 763 Lasky, J. R., M. Uriarte, V. Boukili, and R. L. Chazdon. 2014. Trait-mediated  
764 assembly processes predict successional changes in community diversity of tropical  
765 forests. *Proceedings of the National Academy of Sciences* 111:5616–5621.
- 766 Le Corre, V., and A. Kremer. 2012. The genetic differentiation at quantitative trait  
767 loci under local adaptation. *Molecular Ecology* 21:1548–1566.
- 768 Leimu, R., and M. Fischer. 2008. A meta-analysis of local adaptation in plants. *PLoS*  
769 *ONE* 3:e4010.
- 770 Lenormand, T. 2002. Gene flow and the limits to natural selection. *Trends in Ecology*  
771 *& Evolution* 17:183–189.
- 772 Loreau, M. 2010. From populations to ecosystems: Theoretical foundations for a new  
773 ecological synthesis. Princeton University Press.
- 774 Low-Décarie, E., M. Kolber, P. Homme, A. Lofano, A. Dumbrell, A. Gonzalez, and G.  
775 Bell. 2015. Community rescue in experimental metacommunities. *Proceedings of the*  
776 *National Academy of Sciences* 201513125.
- 777 Lynch, M., and R. Lande. 1993. Evolution and extinction in response to environmental  
778 change. Pages 234–250 *in* Biotic interactions and global change. Sinauer Associates,  
779 Inc, Sunderland, MA.
- 780 MacPherson, A., P. A. Hohenlohe, and S. L. Nuismer. 2015. Trait dimensionality  
781 explains widespread variation in local adaptation. *Proceedings of the Royal Society B:*  
782 *Biological Sciences* 282.
- 783 Mayr, E. 1963. *Animal species and evolution* (Vol. 797). Belknap Press of Harvard  
784 University Press Cambridge, Massachusetts.
- 785 Moran, E. V., and R. A. Ormond. 2015. Simulating the interacting effects of  
786 intraspecific variation, disturbance, and competition on climate-driven range shifts in  
787 trees. *PLoS ONE* 10:e0142369.
- 788 Muscarella, R., and M. Uriarte. 2016. Do community-weighted mean functional traits  
789 reflect optimal strategies? *Proc. R. Soc. B* 283:20152434.
- 790 Norberg, J., M. C. Urban, M. Vellend, C. A. Klausmeier, and N. Loeuille. 2012.  
791 Eco-evolutionary responses of biodiversity to climate change. *Nature Climate Change*  
792 2:747–751.
- 793 Oppen, M. J. H. van, J. K. Oliver, H. M. Putnam, and R. D. Gates. 2015. Building  
794 coral reef resilience through assisted evolution. *Proceedings of the National Academy*  
795 *of Sciences* 112:2307–2313.
- 796 Orr, H. A., and R. L. Unckless. 2008. Population extinction and the genetics of

- 797 adaptation. *The American Naturalist* 172:160–169.
- 798 Osmond, M. M., and C. de Mazancourt. 2013. How competition affects evolutionary  
799 rescue. *Philosophical Transactions of the Royal Society of London B: Biological*  
800 *Sciences* 368:20120085.
- 801 Pachauri, R. K., M. R. Allen, V. R. Barros, J. Broome, W. Cramer, R. Christ, J. A.  
802 Church, et al. 2014. *Climate Change 2014: Synthesis Report. Contribution of Working*  
803 *Groups I, II and III to the Fifth Assessment Report of the Intergovernmental Panel*  
804 *on Climate Change.* (R. K. Pachauri & L. Meyer, eds.). IPCC, Geneva, Switzerland.
- 805 Paul, J. R., S. N. Sheth, and A. L. Angert. 2011. Quantifying the impact of gene flow  
806 on phenotype-environment mismatch: A demonstration with the scarlet monkeyflower  
807 *mimulus cardinalis*. *The American Naturalist* 178:S62–S79.
- 808 Pease, C. M., R. Lande, and J. J. Bull. 1989. A model of population growth, dispersal  
809 and evolution in a changing environment. *Ecology* 70:1657–1664.
- 810 Polechová, J., and N. H. Barton. 2015. Limits to adaptation along environmental  
811 gradients. *Proceedings of the National Academy of Sciences* 112:6401–6406.
- 812 Price, T. D., and M. Kirkpatrick. 2009. Evolutionarily stable range limits set by  
813 interspecific competition. *Proceedings of the Royal Society of London B: Biological*  
814 *Sciences* 276:1429–1434.
- 815 Read, A. F., T. Day, and S. Huijben. 2011. The evolution of drug resistance and the  
816 curious orthodoxy of aggressive chemotherapy. *Proceedings of the National Academy*  
817 *of Sciences of the United States of America* 108 Suppl 2:10871–10877.
- 818 Romiguier, J., P. Gayral, M. Ballenghien, A. Bernard, V. Cahais, A. Chenuil, Y. Chiari,  
819 et al. 2014. Comparative population genomics in animals uncovers the determinants  
820 of genetic diversity. *Nature* 515:261–263.
- 821 Sanford, E., and M. W. Kelly. 2010. Local adaptation in marine invertebrates. *Annual*  
822 *Review of Marine Science* 3:509–535.
- 823 Siepielski, A. M., M. B. Morrissey, M. Buoro, S. M. Carlson, C. M. Caruso, S. M. Clegg,  
824 T. Coulson, et al. 2017. Precipitation drives global variation in natural selection.  
825 *Science* 355:959–962.
- 826 Šímová, I., C. Violle, J.-C. Svenning, J. Kattge, K. Engemann, B. Sandel, R. K. Peet,  
827 et al. 2018. Spatial patterns and climate relationships of major plant traits in the  
828 new world differ between woody and herbaceous species. *Journal of Biogeography*  
829 n/a–n/a.
- 830 Slatkin, M. 1973. GENE FLOW AND SELECTION IN a CLINE. *Genetics* 75:733–756.
- 831 Sternberg, E. D., and M. B. Thomas. 2014. Local adaptation to temperature and the  
832 implications for vector-borne diseases. *Trends in Parasitology* 30:115–122.
- 833 Sultan, S. E., and H. G. Spencer. 2002. Metapopulation structure favors plasticity

- 834 over local adaptation. *The American Naturalist* 160:271–283.
- 835 Taddei, F., M. Radman, J. Maynard-Smith, B. Toupance, P. H. Gouyon, and B.  
836 Godelle. 1997. Role of mutator alleles in adaptive evolution. *Nature* 387:700–702.
- 837 Travis, J., and E. Travis. 2002. Mutator dynamics in fluctuating environments.  
838 *Proceedings of the Royal Society of London. Series B: Biological Sciences* 269:591.
- 839 Turesson, G. 1922. THE SPECIES AND THE VARIETY AS ECOLOGICAL UNITS.  
840 *Hereditas* 3:100–113.
- 841 Turnbull, L. A., M. Rees, and M. J. Crawley. 1999. Seed mass and the competi-  
842 tion/colonization trade-off: A sowing experiment. *Journal of Ecology* 87:899–912.
- 843 Urban, M. C., L. De Meester, M. Vellend, R. Stoks, and J. Vanoverbeke. 2012. A crucial  
844 step toward realism: Responses to climate change from an evolving metacommunity  
845 perspective. *Evolutionary Applications* 5:154–167.
- 846 Urban, M. C., P. L. Zarnetske, and D. K. Skelly. 2013. Moving forward: Dispersal  
847 and species interactions determine biotic responses to climate change. *Annals of the*  
848 *New York Academy of Sciences* 1297:44–60.
- 849 Vanoverbeke, J., M. C. Urban, and L. De Meester. 2015. Community assembly is  
850 a race between immigration and adaptation: Eco-evolutionary interactions across  
851 spatial scales. *Ecography* n/a–n/a.
- 852 Yeaman, S., and A. Jarvis. 2006. Regional heterogeneity and gene flow maintain  
853 variance in a quantitative trait within populations of lodgepole pine. *Proceedings of*  
854 *the Royal Society B: Biological Sciences* 273:1587.
- 855 Yeaman, S., and M. C. Whitlock. 2011. THE GENETIC ARCHITECTURE OF  
856 ADAPTATION UNDER MIGRATION–SELECTION BALANCE. *Evolution* 65:1897–  
857 1911.
